# Supplementary material for: Using signal amplification by reversible exchange (SABRE) to hyperpolarise 119Sn and 29Si NMR nuclei
Source: PubMed Central journal article supplement (PMC5436037; doi:10.1039/c6cc07109k), 2016-11-23
Supplement: CC-052-C6CC07109K-s001.pdf [file CC-052-C6CC07109K-s001.pdf]

# Using Signal Amplification by Reversible Exchange (SABRE) to hyperpolarise $^{119}\text{Sn}$ and $^{29}\text{Si}$ NMR nuclei

Alexandra M. Olaru,<sup>a</sup> Alister Burt,<sup>a</sup> Peter J. Rayner,<sup>a</sup> Sam Hart,<sup>a</sup> Adrian C. Whitwood,<sup>a</sup> Gary G. R. Green<sup>a</sup> and Simon B. Duckett<sup>\*a</sup>

## 1. Materials and methods

- 1.1 Materials
- 1.2 Synthesis of 5-(trimethylsilyl)pyrimidine
- 1.3 Instrumentation and procedures

## 2. Experimental Results

- 2.1  $^1\text{H}$  SABRE polarisation of 2a
- 2.2  $^{119}\text{Sn}$  SABRE polarisation of 2a and 2b
- 2.3 Rates of  $\text{H}_2$  loss for 2a and 2b
- 2.4  $^1\text{H}$  SABRE polarisation of 3a and 3b
- 2.5  $^{29}\text{Si}$  SABRE polarisation of 3a and 3b
- 2.6 Rates of  $\text{H}_2$  loss for 3a and 3b
- 2.7 Complex characterisation by XRD – 3a
- 2.8 Complex characterisation by XRD – 3b
- 2.9 Complex characterisation by NMR

## 3. References

## 1. Materials and Methods

### 1.1 Materials

All the experimental procedures that are associated with this work were carried out under nitrogen using standard Schlenk techniques. The solvents used in the synthetic chemistry were dried using an Innovative Technology anhydrous solvent system, or distilled from an appropriate drying agent under nitrogen. Catalysts were prepared according to literature methods [1].

Deuterated methanol and tributylstannyl pyrimidine were obtained from Sigma-Aldrich and used as supplied. 5-(trimethylsilane)pyrimidine was synthesised as described below.

### 1.2 Synthesis of 5-(trimethylsilyl)pyrimidine

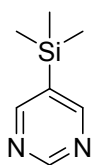

Magnesium (1.2 g, 50 mmol, 1.25 eq.) was added to a stirred solution of trimethylsilylchloride (5.43 g 50 mmol, 1.25 eq.) in 1,3-dimethyl-2-imidazolidinone (DMI) (50 mL) at rt under N<sub>2</sub>(g). The resulting suspension was heated at 80 °C for 4 h. Then, a solution of 5-bromopyrimidine (6.40 g, 40 mmol, 1.0 eq.) in DMI (50 mL) was added whilst maintaining the temperature at 80 °C. The resulting solution was heated at 75 °C for 18 h and then cooled to room temperature. Water (200 mL) was added and the solution was adjusted to pH 10 with 2 M NaOH<sub>(aq)</sub>. The solution was extracted with EtOAc (3 x 250 mL) and the combined organic layers were washed with water (4 x 250 mL), dried (MgSO<sub>4</sub>) and concentrated under reduced pressure to give the crude product. Purification by flash column chromatography on silica with 9:1-8:2 hexane-EtOAc as eluent gave 5-(trimethylsilyl)pyrimidine (341 mg, 5.6%) as a colourless oil, *R<sub>F</sub>* (8:2 hexane-EtOAc) 0.2; <sup>1</sup>H NMR (400 MHz, CDCl<sub>3</sub>) δ 9.06 (s, 1H), 8.65 (s, 2H), 0.22 (s, 9H); <sup>13</sup>C NMR (100.6 MHz, CDCl<sub>3</sub>) δ 161.0, 158.8, 132.2, 1.71; MS (ESI) *m/z* 153 [(M + H)<sup>+</sup>, 100]; HRMS *m/z* calculated for C<sub>7</sub>H<sub>12</sub>N<sub>2</sub>Si (M + H)<sup>+</sup> 153.0843, found 153.0837 (+3.8 ppm error).

### 1.3 Instrumentation and procedures

All NMR measurements were recorded on Bruker Avance III series 400 MHz or 500 MHz systems. NMR samples were prepared in 5 mm NMR tubes fitted with Young's valves. Samples were degassed prior to *p*-H<sub>2</sub> (3 bars) addition. NMR characterization data was collected using a range of 1 and 2D methods that included nOe, COSY and HMQC procedures [2-6]. The slow dynamic processes exhibited by the complexes studied here were monitored by EXSY methods [7]. The quoted <sup>119</sup>Sn chemical shifts are relative to that of SnMe<sub>4</sub> being zero at an absolute frequency of 32.290655 MHz when <sup>1</sup>H is 100.00 MHz.

**SABRE analysis** NMR samples were prepared containing **2** and **3** in 0.6 ml of methanol- $d_4$ . Arrays of NMR measurements were collected using various concentrations of the complexes formed with **1a** and **1b** (**a** denotes the complex formed with the IMes catalyst, while **b** stands for the SIMes catalyst, as described in the results section of the main text). After adding  $p$ -H<sub>2</sub> at 3 bar pressure <sup>1</sup>H NMR spectra were recorded using  $\pi/2$  excitation pulses immediately after shaking the sample in a magnetic field of 65 G. <sup>29</sup>Si and <sup>119</sup>Sn were hyperpolarised in a similar fashion, but using a PTF of approximately 25 G. Enhancement factors were calculated by using the ratio of the integral areas of individual resonances in the hyperpolarised spectra and the spectrum collected under normal H<sub>2</sub> and Boltzmann equilibrium conditions respectively. Antiphase spectra were processed in magnitude mode.

**EXSY measurements and kinetic analysis** A series of exchange spectroscopy (EXSY) measurements were made to probe the dynamic behaviour of these systems. This process involved the selective excitation of a single resonance and the subsequent measurement of a <sup>1</sup>H NMR spectrum at time,  $t$ , after the initial pulse. The resulting measurements consisted of a series of data arrays such that  $t$  was varied over 10-25 values, typically from 0.1 to 1.0 s, to encode the reaction profile. The precise values were varied with temperature to suit the speed of the process. Data was collected for a range of temperatures and sample concentrations.

Integrals for the interchanging peaks in the associated <sup>1</sup>H EXSY spectra were obtained and converted into a percentage of the total detected signal. These data were then analysed as a function of the mixing time according to a differential kinetic model [8]. Rates of exchange were determined by employing a Runge-Kutta [9, 10] scheme to solve the system of differential equations and a Levenberg–Marquardt algorithm [11, 12] to minimise the sum of residuals in the associated nonlinear least squares analysis. The theoretical model used to fit the experimental EXSY data involved a two-site exchange ( $A \leftrightarrow B$ ), as expressed by the equations below:

$$-\frac{dA}{dt} = -K_{ab} * A + K_{ba} * B$$

$$-\frac{dB}{dt} = +K_{ab} * A - K_{ba} * B$$

An example of typical build-up/decay curves obtained from the integration of the experimental EXSY data, together with the corresponding fitted data is presented in Figure S1.

Thermodynamic parameters were calculated using the exchange rates obtained for a wide range of temperatures (detailed below) and the Eyring-Polanyi equation [13, 14].

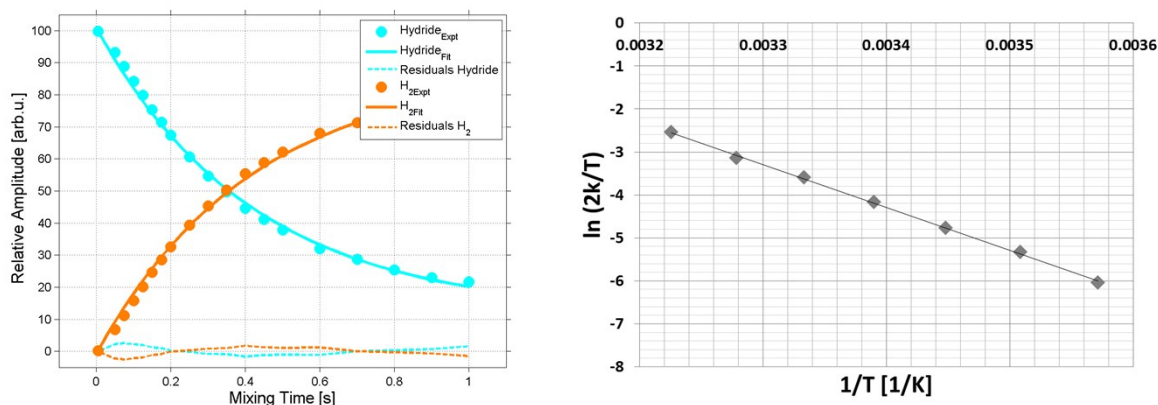

Figure S1: Build-up/decay obtained from the integration of experimental EXSY data recorded for **2b** at 295 K (left) and corresponding Eyring plot for the H<sub>2</sub> loss process (right).

## 2. Experimental results

### 2.1 <sup>1</sup>H SABRE polarisation of **2a**.

We have examined the effect of concentration and ligand excess on the level of proton signal enhancement that is detected under SABRE conditions by preparing sets of samples in which:

- i). The concentration of **1a** was kept at 5 mM while the excess of **2** was progressively increased.
- ii). The ratio between **1a** and **2** was kept constant while the concentration **1a** was progressively increased.

For each sample, typically 5 to 7 hyperpolarised spectra were acquired and the integral areas of each peak were averaged and divided by the corresponding integral obtained from a spectrum acquired in Boltzmann equilibrium conditions. Errors for the resulting individual enhancements have been calculated using the standard deviation formula, taking into account the limited number of population samples. The errors for the total enhancements have been determined using the formula for the Gaussian propagation of errors.

In order to determine the effect of the substrate loading, a series of samples containing 5 mM of **1a** and increasing excess of **2** were prepared in methanol-*d*<sub>4</sub> and examined for SABRE polarisation. The results and the associated errors are detailed in Table S1 and depicted in Figure S2. It can be seen that the signal enhancement for both sites decreases with increasing ligand excess, from -2036 (1-fold excess) to -345 (27-fold excess), in a similar way to other substrates previously examined [15].

Table S1. <sup>1</sup>H SABRE enhancement as a function of substrate loading for 2a.

| Excess [-fold] | $\epsilon$ (H-2) [arb. u.] | $\epsilon$ (H-4, H-6) [arb. u.] | $\epsilon$ (total) [arb. u.] |
|----------------|----------------------------|---------------------------------|------------------------------|
| 1              | -827 ± 86                  | -1210 ± 130                     | -2036 ± 156                  |
| 4              | -551 ± 55                  | -973 ± 99                       | -1524 ± 113                  |
| 7              | -538 ± 42                  | -1003 ± 83                      | -1541 ± 93                   |
| 12             | -411 ± 26                  | -751 ± 42                       | -1162 ± 49                   |
| 17             | -282 ± 26                  | -477 ± 96                       | -759 ± 99                    |
| 27             | -143 ± 14                  | -203 ± 18                       | -345 ± 23                    |

It must be noted that usually, as the efficiency of the polarisation transfer process directly depends on the scalar coupling between the ligand's protons and the hydrides, each resonance will be differently enhanced, as a function of the proton's relative position to the binding site. The complexity of this process is furthermore increased by the fact that the individual protons also have different relaxation times, so the enhancement obtained will be affected by the rate of signal decay. In the case of **2** all three resonances in the pyrimidine ring are *ortho* to a nitrogen atom, so their enhancements are comparable, the value for H-2 being slightly higher than half of the one obtained for the sum of H-4 and H-6 (for which individual enhancements could not be determined due to peak overlap).

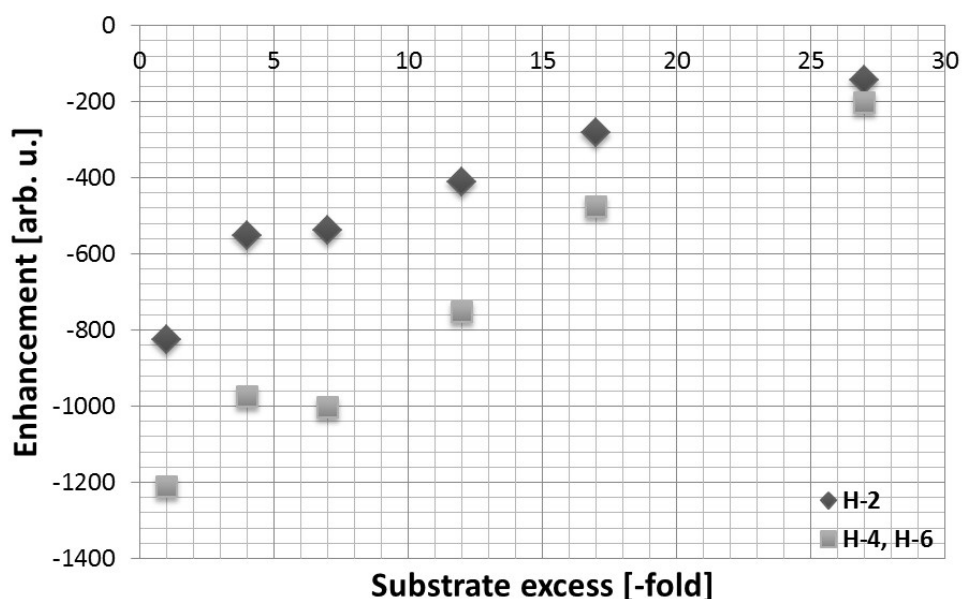

Figure S2. <sup>1</sup>H SABRE enhancement as a function of substrate loading for 2a.

In order to establish the effect the catalyst loading has on the enhancements, samples containing **1a** and **2** in a 1:10 ratio (7-fold excess) have been prepared by dilution from a stock solution of 12.5 mM concentration and were examined for SABRE polarisation. (While the complex prepared with just 1-fold excess gave better enhancement values, the optimal ratio was chosen to be 1:10 due to considerably higher SNR values). The results and the associated errors are detailed in Table S2 and pictured in Figure S3.

Table S2.  $^1\text{H}$  SABRE enhancement as a function of catalyst concentration for **2a**.

| Catalyst concentration [ $\text{mM}\cdot\text{dm}^{-3}$ ] | $\epsilon$ (H-2) [arb. u.] | $\epsilon$ (H-4, H-6) [arb. u.] | $\epsilon$ (total) [arb. u.] |
|-----------------------------------------------------------|----------------------------|---------------------------------|------------------------------|
| 2.5                                                       | $-803 \pm 73$              | $-1486 \pm 156$                 | $-2289 \pm 179$              |
| 5.0                                                       | $-505 \pm 57$              | $-962 \pm 101$                  | $-1467 \pm 116$              |
| 7.5                                                       | $-406 \pm 89$              | $-795 \pm 174$                  | $-1201 \pm 196$              |
| 10.0                                                      | $-305 \pm 24$              | $-548 \pm 20$                   | $-853 \pm 31$                |
| 12.5                                                      | $-331 \pm 29$              | $-631 \pm 62$                   | $-962 \pm 69$                |

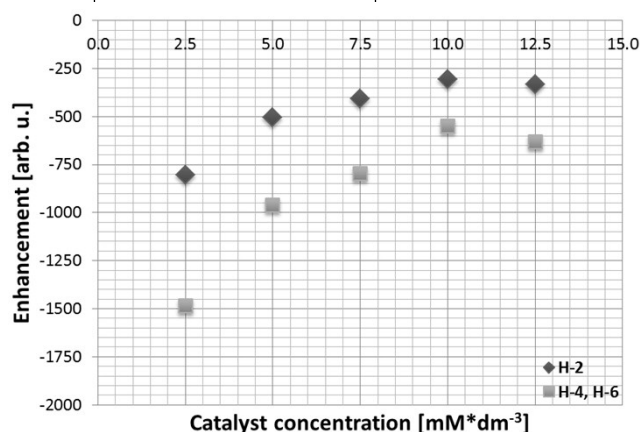

Figure S3.  $^1\text{H}$  SABRE enhancement as a function of substrate concentration for **2a**.

After optimising the substrate loading and the complex concentration, the maximum  $^1\text{H}$  SABRE enhancement obtained was  $-2289$  (see figures S2 and S3).

## 2.2 $^{119}\text{Sn}$ SABRE polarisation of **2a** and **2b**.

In order to detect a  $^{119}\text{Sn}$  signal, a series of shake and drop experiments were performed after 5 seconds of polarisation transfer in a magnetic field of  $\sim 25$  G on samples containing **2a** and **2b**.  $^{119}\text{Sn}$  SABRE hyperpolarisation was indeed observed (Figure S4). Due to the SNR values for **2a** (380 and 1098 for not-decoupled and decoupled spectra respectively) being considerably higher than for **2b** (185 and 432 for not-decoupled and decoupled spectra respectively), **2a** was chosen for a series of optimisation experiments that were conducted to determine the sample composition that leads to the best signal gain.

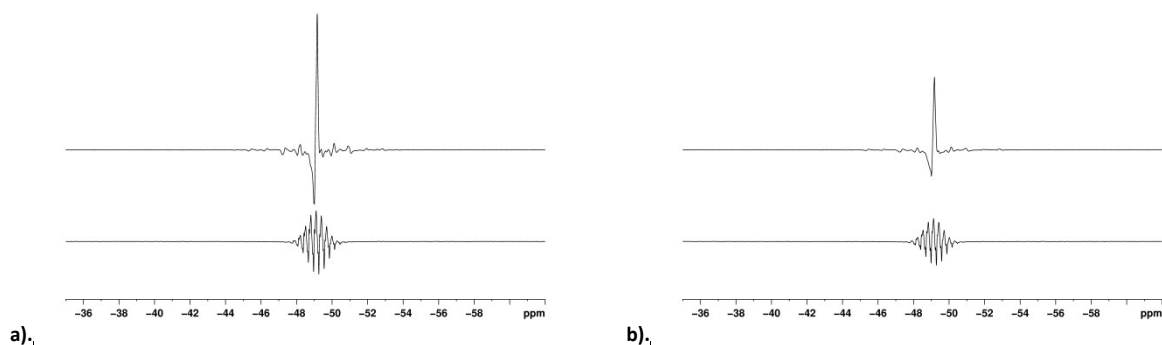

Figure S4.  $^{119}\text{Sn}$  hyperpolarised spectra without  $^1\text{H}$  decoupling (bottom) and with  $^1\text{H}$  decoupling applied on the butyl protons (top) of a). **2a** and b). **2b**.

First, samples were prepared at various ratios of catalyst to substrate, with a set catalyst concentration of 5 mmol\*dm<sup>-3</sup>. SNR values were calculated for spectra acquired without <sup>1</sup>H decoupling (ND) and with <sup>1</sup>H decoupling pulses applied on the butyl resonances. Figures S4 and S5 show the resulting plots of <sup>119</sup>Sn signal enhancement, and SNR values, as a function of the free ligand concentration.

**Table S3.** <sup>119</sup>Sn SNR as a function of substrate loading/excess for 2a.

| Substrate loading [mM*dm <sup>-3</sup> ] | Excess [-fold] | SNR (ND)  | SNR (D)   |
|------------------------------------------|----------------|-----------|-----------|
| 20                                       | 1              | 9 ± 1     | 28 ± 5    |
| 50                                       | 7              | 190 ± 22  | 534 ± 146 |
| 100                                      | 17             | 375 ± 130 | 1099 ± 93 |
| 150                                      | 27             | 328 ± 14  | 758 ± 75  |
| 200                                      | 37             | 326 ± 13  | 868 ± 93  |
| 250                                      | 47             | 287 ± 21  | 773 ± 49  |
| 300                                      | 57             | 239 ± 18  | 705 ± 67  |

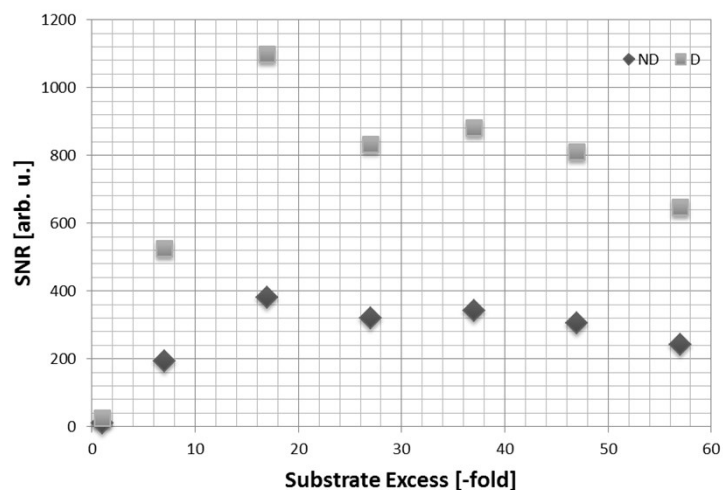

**Figure S4.** <sup>119</sup>Sn SNR as a function of substrate loading for 2a.

The enhancement values for <sup>119</sup>Sn have been calculated by dividing the average SNR of the hyperpolarised spectra to the SNR of the spectrum of a reference sample, prepared with 5 mM **1a** and 100 mM **2**, acquired in Boltzmann equilibrium conditions using 3096 scans.

Table S4.  $^{119}\text{Sn}$  enhancement as a function of substrate loading for 2a.

| Substrate loading [ $\text{mM} \cdot \text{dm}^{-3}$ ] | Excess [-fold] | $\epsilon$ (ND) [arb. u.] | $\epsilon$ (D) [arb. u.] |
|--------------------------------------------------------|----------------|---------------------------|--------------------------|
| 20                                                     | 1              | 86                        | 98                       |
| 50                                                     | 7              | 696                       | 750                      |
| 100                                                    | 17             | 687                       | 772                      |
| 150                                                    | 27             | 400                       | 355                      |
| 200                                                    | 37             | 299                       | 305                      |
| 250                                                    | 47             | 211                       | 217                      |
| 300                                                    | 57             | 146                       | 165                      |

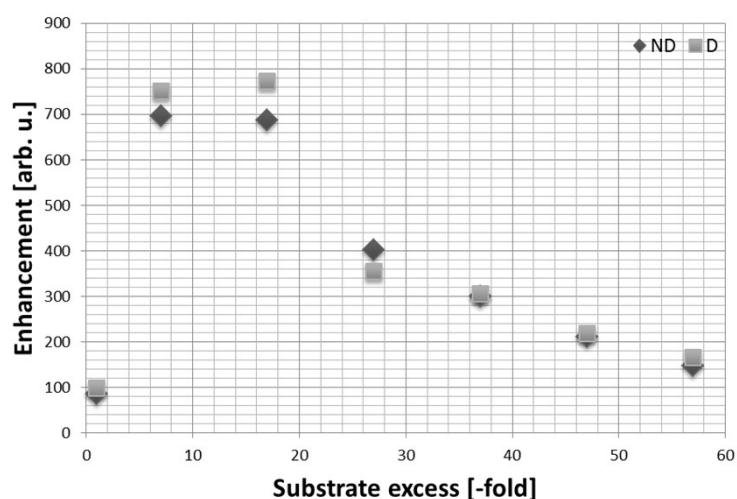

Figure S5.  $^{119}\text{Sn}$  enhancement as a function of substrate loading for 2a.

The 100 mM substrate loading proved to yield the most intense  $^{119}\text{Sn}$  signal. Hence a catalyst to substrate ratio of 1:20 (17-fold excess of substrate to catalyst) was employed in further series of optimisation measurements. The results are presented in tables T-S5 and T-S6 and depicted in figures S6 and S7.

Table S5.  $^{119}\text{Sn}$  SNR as a function of catalyst loading for 2a.

| Catalyst concentration [ $\text{mM} \cdot \text{dm}^{-3}$ ] | SNR (ND) [arb. u.] | SNR (D) [arb. u.] |
|-------------------------------------------------------------|--------------------|-------------------|
| 0.5                                                         | $22 \pm 2$         | $70 \pm 2$        |
| 2.5                                                         | $153 \pm 4$        | $398 \pm 7$       |
| 5.0                                                         | $118 \pm 8$        | $544 \pm 30$      |
| 7.5                                                         | $289 \pm 2$        | $749 \pm 31$      |
| 10.0                                                        | $274 \pm 11$       | $619 \pm 51$      |
| 12.5                                                        | $274 \pm 4$        | $582 \pm 50$      |
| 15.0                                                        | $181 \pm 7$        | $439 \pm 14$      |



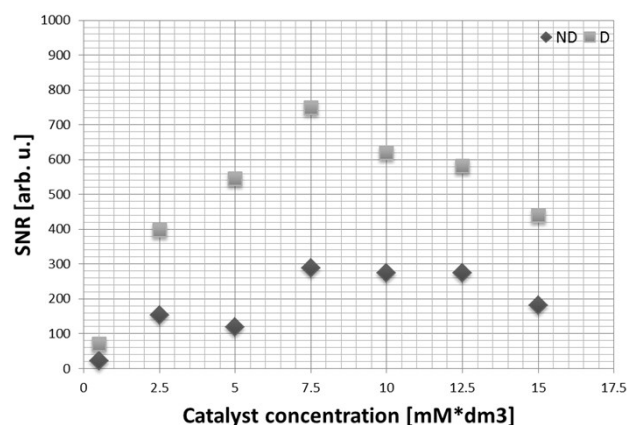

Figure S6. <sup>119</sup>Sn SNR as a function of catalyst concentration for 2a.

Table S6. <sup>119</sup>Sn enhancement as a function of catalyst concentration for 2a.

| Catalyst concentration [mM*dm <sup>-3</sup> ] | ε (ND) [arb. u.] | ε (D) [arb. u.] |
|-----------------------------------------------|------------------|-----------------|
| 0.5                                           | 405              | 491             |
| 2.5                                           | 574              | 556             |
| 5.0                                           | 222              | 380             |
| 7.5                                           | 362              | 349             |
| 10.0                                          | 258              | 216             |
| 12.5                                          | 207              | 163             |
| 15.0                                          | 114              | 102             |

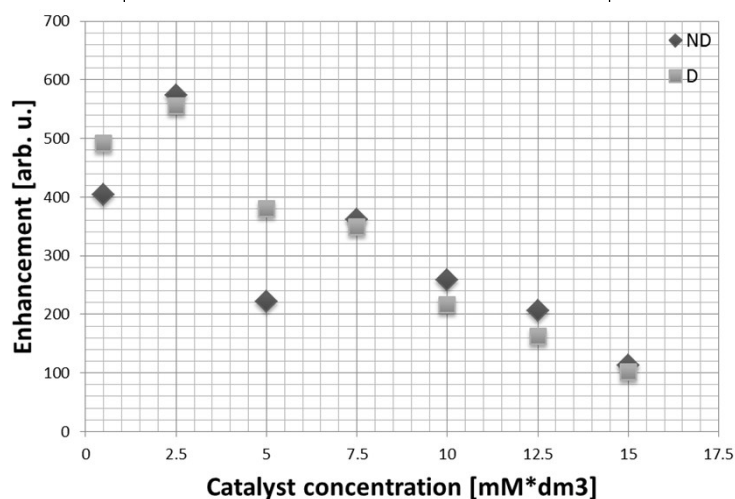

Figure S7. <sup>119</sup>Sn enhancement as a function of catalyst concentration for 2a.

### 2.3 Rates of H<sub>2</sub> loss for 2a and 2b.

The rates of H<sub>2</sub> elimination from complexes **2a** and **2b** have been determined by EXSY spectroscopy over the temperature range 280-315 K and 275-310 K respectively in methanol-*d*<sub>4</sub> solution. The results are presented below, in tables Table S7 and Table S8 (corresponding activation parameters).

**Table S7.** H<sub>2</sub> loss rates for **2a** and **2b** as a function of temperature for 7.5 mM catalyst and 17-fold substrate excess.

|                 | <b>2a</b>      | <b>2b</b>      |
|-----------------|----------------|----------------|
| Temperature [K] | <i>k</i> [1/s] | <i>k</i> [1/s] |
| 270             | -              | 0.03 ± 0.01    |
| 275             | -              | 0.11 ± 0.01    |
| 280             | 0.06 ± 0.01    | 0.33 ± 0.01    |
| 285             | 0.13 ± 0.01    | 0.69 ± 0.01    |
| 290             | 0.25 ± 0.01    | 1.23 ± 0.01    |
| 295             | 0.57 ± 0.01    | 2.29 ± 0.02    |
| 300             | 1.14 ± 0.02    | 4.11 ± 0.03    |
| 305             | 2.23 ± 0.02    | 6.59 ± 0.10    |
| 310             | 4.12 ± 0.13    | 12.20 ± 0.18   |
| 315             | 6.98 ± 0.22    | -              |

**Table S8.** Activation parameters for **2a** and **2b**.

| Activation Parameters                                      | <b>2a</b> | <b>2b</b> |
|------------------------------------------------------------|-----------|-----------|
| $\Delta H^\ddagger$ (kJ mol <sup>-1</sup> )                | 100       | 83        |
| +/-                                                        | 3         | 3         |
| $\Delta S^\ddagger$ (J K <sup>-1</sup> mol <sup>-1</sup> ) | 93        | 49        |
| +/-                                                        | 12        | 10        |
| $\Delta G^\ddagger_{300}$ (kJ mol <sup>-1</sup> )          | 71.5      | 68.3      |
| +/-                                                        | 0.1       | 0.2       |
| R Square                                                   | 0.998     | 0.999     |

## 2.4 <sup>1</sup>H SABRE hyperpolarisation of **3a** and **3b**.

Samples containing **3a** and **3b** were prepared, using the optimum complex concentrations and number of ligand equivalents determined for **2a** and **2b**, namely 2.5 mM (1:10, 7-fold excess of substrate) for <sup>1</sup>H and 7.5 mM (1:20, 17-fold excess of substrate) for <sup>29</sup>Si. <sup>1</sup>H SABRE enhanced spectra of **3a** and **3b** are presented below, in Figure S8.

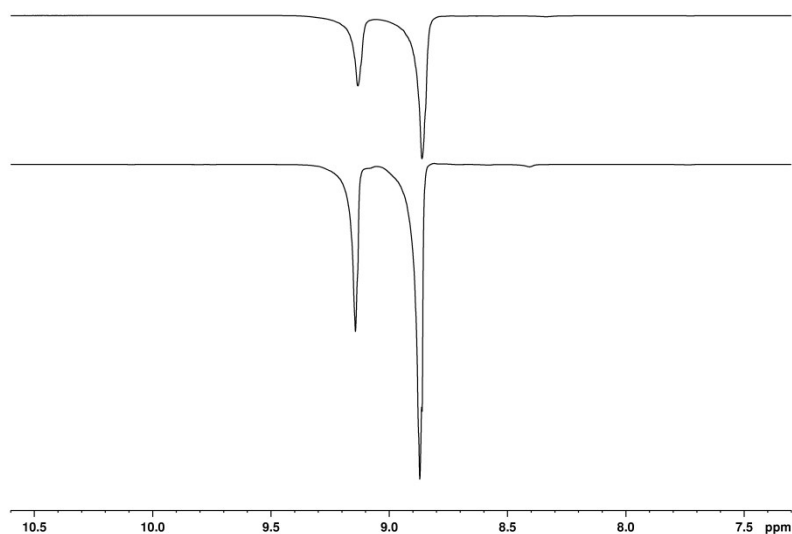

Figure S8.  $^1\text{H}$  hyperpolarised spectra of **3a** (bottom) and **3b** (top). Samples have been prepared using the amounts optimised for **2a/2b**: 2.5 mM of **1a** and **b** respectively and 25 mM of **3**.

The enhancement values were calculated as described previously and detailed in Table S9.

Table S9.  $^1\text{H}$  enhancements for **3a** and **3b**.

|           | $\epsilon$ (H-2) [arb. u.] | $\epsilon$ (H-4, H-6) [arb. u.] | $\epsilon$ (total) [arb. u.] |
|-----------|----------------------------|---------------------------------|------------------------------|
| <b>3a</b> | $-761 \pm 41$              | $-1524 \pm 79$                  | $-2285 \pm 89$               |
| <b>3b</b> | $-450 \pm 41$              | $-897 \pm 82$                   | $-1347 \pm 92$               |

## 2.5 $^{29}\text{Si}$ SABRE hyperpolarisation of **3a** and **3b**.

SABRE hyperpolarisation experiments have been performed for  $^{29}\text{Si}$  at 25 G.  $^{29}\text{Si}$  hyperpolarised spectra, acquired both with, and without, methyl proton decoupling, are presented in Figure S9, together with a thermal trace acquired using 128 scans. The single shot  $^{29}\text{Si}$  hyperpolarised spectrum has an SNR of 71, while the thermal trace SNR is 15 (which corresponds to an SNR value of 1.4 per scan). The acquisition time for the spectrum using magnetisation at thermal equilibrium was 21 h 20 min.

Table S10. SNR values obtained for **3a** and **3b** as a function of concentration and ligand loading obtained from experiments without (ND) and with (D)  $^1\text{H}$  decoupling of the methyl protons.

| Sample                                                  | SNR [arb.u]  | SNR [arb.u] |
|---------------------------------------------------------|--------------|-------------|
|                                                         | ND           | D           |
| <b>3a</b> (2.5 mM <b>1a</b> , 7-fold substrate excess)  | $200 \pm 14$ | $27 \pm 5$  |
| <b>3b</b> (2.5 mM <b>1b</b> , 7-fold substrate excess)  | $81 \pm 3$   | $9 \pm 1$   |
| <b>3a</b> (7.5 mM <b>1a</b> , 17-fold substrate excess) | $118 \pm 20$ | $13 \pm 1$  |
| <b>3b</b> (7.5 mM <b>1b</b> , 17-fold substrate excess) | $95 \pm 10$  | $19 \pm 2$  |

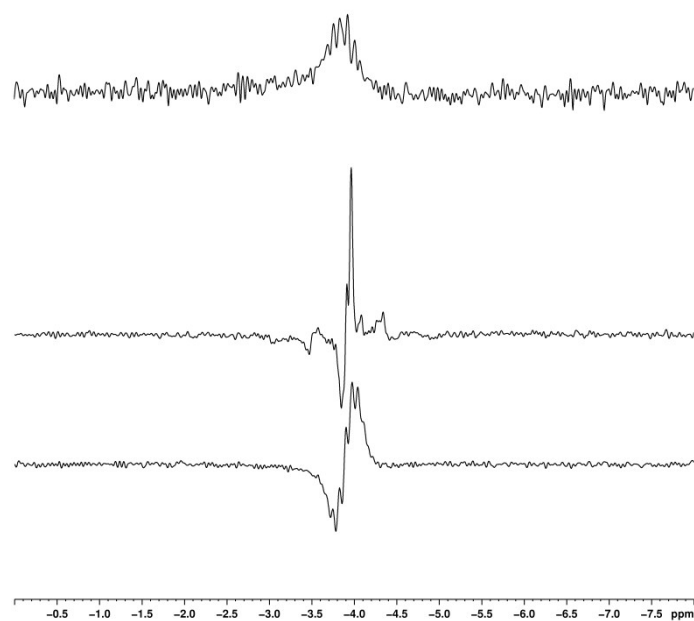

Figure S9.  $^{29}\text{Si}$  thermal trace for **3a** (top) acquired using 128 averages and hyperpolarised spectra (bottom).

## 2.6 Rates of $\text{H}_2$ loss for **3a** and **3b**

The rates characterising the  $\text{H}_2$  loss process were measured as described above and are listed in Table S11.

Table S11.  $\text{H}_2$  loss rates for **3a** and **3b** as a function of concentration at 295 K.

| Complex                                                 | $\text{H}_2$ loss rate [1/s] |
|---------------------------------------------------------|------------------------------|
| <b>3a</b> (2.5 mM <b>1a</b> , 7-fold substrate excess)  | $6.06 \pm 0.14$              |
| <b>3b</b> (2.5 mM <b>1b</b> , 7-fold substrate excess)  | $18.40 \pm 1.14$             |
| <b>3a</b> (7.5 mM <b>1a</b> , 17-fold substrate excess) | $1.44 \pm 0.02$              |
| <b>3b</b> (7.5 mM <b>1b</b> , 17-fold substrate excess) | $5.11 \pm 0.07$              |

As for the  $^{119}\text{Sn}$  compounds, the rates of  $\text{H}_2$  loss are considerably higher for **3b** when compared to **3a**. It is also worth noting that for the compounds with a concentration and catalyst:substrate ratio optimised for  $^1\text{H}$  polarisation are 3 to 6 times higher than for the complexes optimised for  $^{119}\text{Sn}$  polarisation.

**Table S12.** H<sub>2</sub> loss rates for 3a and 3b as a function of temperature for 7.5 mM catalyst and 17-fold substrate excess.

| <b>Complex</b>  | <b>3a</b>      | <b>3b</b>      |
|-----------------|----------------|----------------|
| Temperature [K] | <i>k</i> [1/s] | <i>k</i> [1/s] |
| 260             | -              | 0.03 ± 0.01    |
| 265             | -              | 0.08 ± 0.01    |
| 270             | -              | 0.19 ± 0.01    |
| 275             | 0.06 ± 0.01    | 0.43 ± 0.01    |
| 280             | 0.16 ± 0.01    | 0.86 ± 0.01    |
| 285             | 0.40 ± 0.01    | 1.58 ± 0.11    |
| 290             | 0.82 ± 0.01    | 2.89 ± 0.03    |
| 295             | 1.44 ± 0.02    | 5.11 ± 0.07    |
| 300             | 3.33 ± 0.03    | -              |

**Table S13.** Activation parameters for 3a and 3b.

| <b>Activation Parameters</b>                               | <b>3a</b> | <b>3b</b> |
|------------------------------------------------------------|-----------|-----------|
| $\Delta H^\ddagger$ (kJ mol <sup>-1</sup> )                | 104.7     | 90.4      |
| +/-                                                        | 10.3      | 6.0       |
| $\Delta S^\ddagger$ (J K <sup>-1</sup> mol <sup>-1</sup> ) | 119.9     | 82.3      |
| +/-                                                        | 36.2      | 21.8      |
| $\Delta G^\ddagger_{300}$ (kJ mol <sup>-1</sup> )          | 68.7      | 65.7      |
| +/-                                                        | 0.1       | 0.1       |
| R Square                                                   | 0.994     | 0.995     |

## 2.7 Complex characterisation by XRD – 3a

X-ray diffraction of the tributyl tin analogue was attempted. The crystals proved to be of too poor quality (even with synchrotron radiation) to produce a complete structure due to poor mosaicity and considerable disorder of the butyl side chains. However, it was apparent that the complex had the same cyclic trimer structure as the silicon-containing complexes now described.

### 2.7.1 Experimental

Single crystals of  $C_{84}H_{114}Cl_3Ir_3N_{12}Si_3$  were prepared in methanol- $d_4$ , under 3 bar  $H_2$ . A suitable crystal was selected, immersed in oil and placed on a micromount on a SuperNova, Dual, Cu at zero, Eos diffractometer. The crystal was kept at 110.05(10) K during data collection. Using Olex2 [16], the structure was solved with the ShelXS [17] structure solution program using Direct Methods and refined with the ShelXL [18] refinement package using Least Squares minimisation.

### 2.7.2 Crystal structure determination of $C_{84}H_{114}Cl_3Ir_3N_{12}Si_3$

Crystal Data for  $C_{84}H_{114}Cl_3Ir_3N_{12}Si_3$  ( $M = 2059.09$  g/mol): monoclinic, space group P21/c (no. 14),  $a = 20.9974(5)$  Å,  $b = 14.9781(4)$  Å,  $c = 31.1032(9)$  Å,  $\beta = 94.152(3)^\circ$ ,  $V = 9756.4(4)$  Å<sup>3</sup>,  $Z = 4$ ,  $T = 110.05(10)$  K,  $\mu(CuK\alpha) = 9.206$  mm<sup>-1</sup>,  $D_{calc} = 1.402$  g/cm<sup>3</sup>, 33778 reflections measured ( $7.334^\circ \leq 2\theta \leq 134.16^\circ$ ), 17287 unique ( $R_{int} = 0.0319$ ,  $R_{\sigma} = 0.0438$ ) which were used in all calculations. The final  $R_1$  was 0.0411 ( $I > 2\sigma(I)$ ) and  $wR_2$  was 0.1026 (all data).

### 2.7.3 Refinement model description

Number of restraints - 0, number of constraints - unknown.

#### Details:

#### 1. Fixed Uiso

At 1.2 times of: All C(H) groups.

At 1.5 times of: All C(H,H,H) groups, All Ir(H,H) groups.

#### 2.a. Riding coordinates: Ir1(H,HA), Ir2(HB,HC), Ir3(HD,HE).

#### 2.b. Aromatic/amide H refined with riding coordinates:

C2(H2), C3(H3), C6(H6), C8(H8), C15(H15), C17(H17), C22(H22), C23(H23), C25(H25), C30(H30), C31(H31), C34(H34), C36(H36), C43(H43), C45(H45), C50(H50), C51(H51), C53(H53), C58(H58), C59(H59), C62(H62), C64(H64), C71(H71), C73(H73), C78(H78), C79(H79), C81(H81).

#### 2.c. Idealised Me refined as rotating group:

|                      |                      |                      |                      |
|----------------------|----------------------|----------------------|----------------------|
| C10(H10A,H10B,H10C), | C11(H11A,H11B,H11C), | C12(H12A,H12B,H12C), | C19(H19A,H19B,H19C), |
| C20(H20A,H20B,H20C), | C21(H21A,H21B,H21C), | C26(H26A,H26B,H26C), | C27(H27A,H27B,H27C), |
| C28(H28A,H28B,H28C), | C38(H38A,H38B,H38C), | C39(H39A,H39B,H39C), | C40(H40A,H40B,H40C), |
| C47(H47A,H47B,H47C), | C48(H48A,H48B,H48C), | C49(H49A,H49B,H49C), | C54(H54A,H54B,H54C), |
| C55(H55A,H55B,H55C), | C56(H56A,H56B,H56C), | C66(H66A,H66B,H66C), | C67(H67A,H67B,H67C), |
| C68(H68A,H68B,H68C), | C75(H75A,H75B,H75C), | C76(H76A,H76B,H76C), | C77(H77A,H77B,H77C), |
| C82(H82A,H82B,H82C), | C83(H83A,H83B,H83C), | C84(H84A,H84B,H84C). |                      |

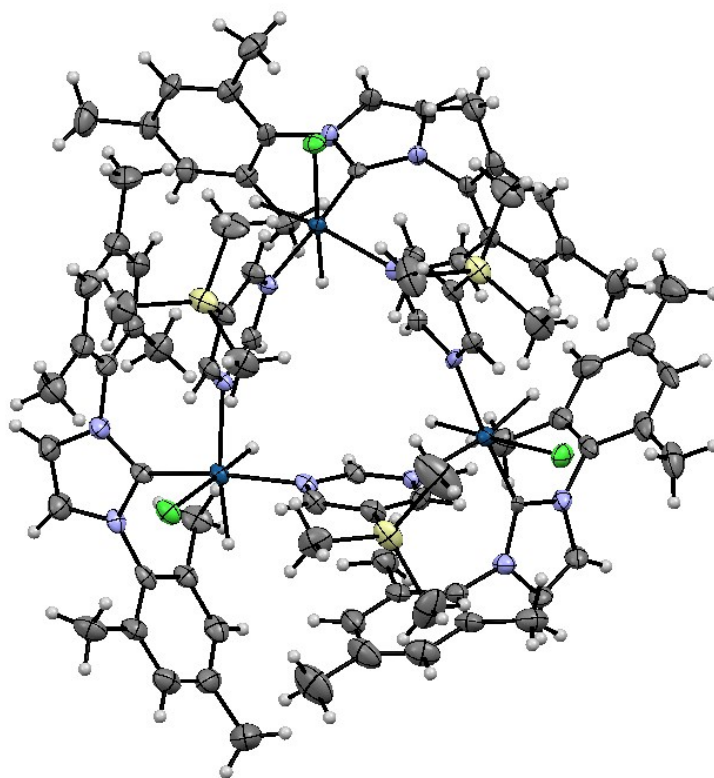

Figure S10. XRD structure of  $C_{84}H_{114}Cl_3Ir_3N_{12}Si_3$ .

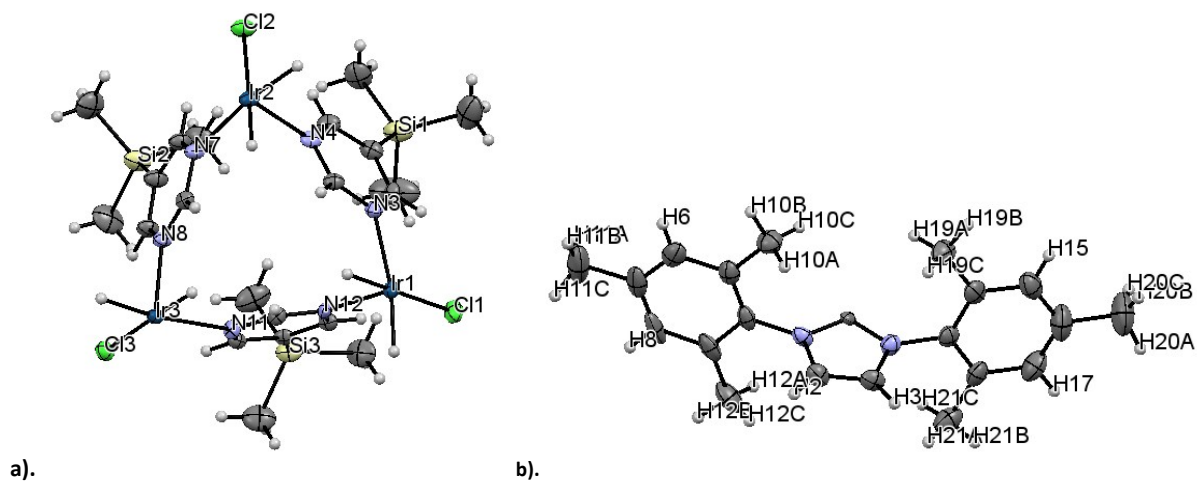

Figure S11. Selected aspects of the XRD structure of  $C_{84}H_{114}Cl_3Ir_3N_{12}Si_3$ : a). Representation of central trimer without the three carbene units attached to the Ir atoms; b). Representation of the carbene unit with the corresponding atom labels.

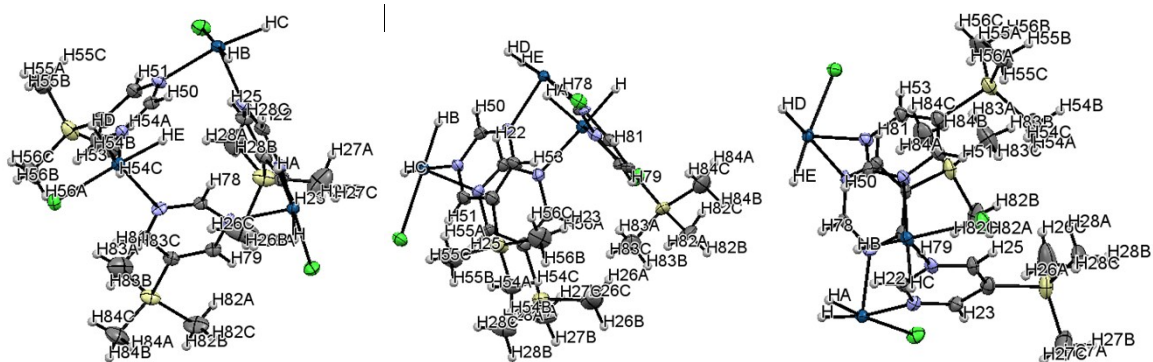

Figure S12. Selected aspects of the XRD structure of  $C_{84}H_{114}Cl_3Ir_3N_{12}Si_3$ : Representation of central trimer without the three carbene units attached to the Ir atoms and the corresponding labels for the H atoms. For clarity the trimer is presented from three different perspectives.

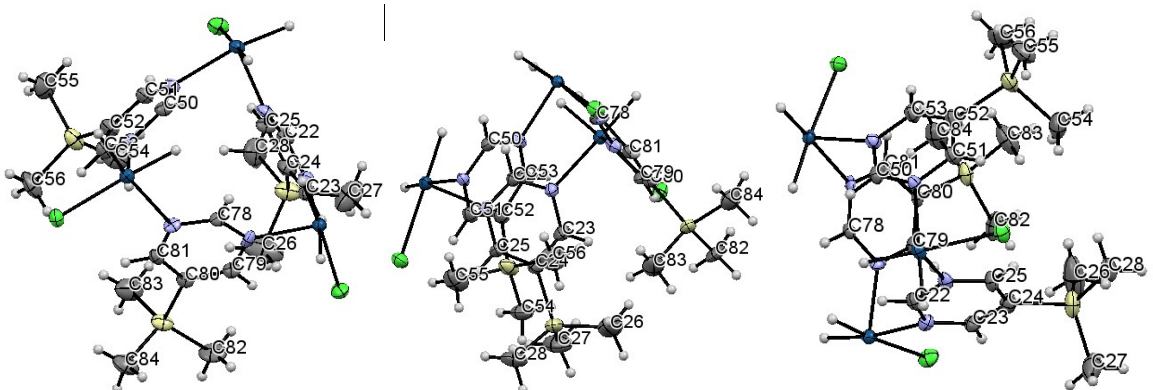

Figure S13. Selected aspects of the XRD structure of  $C_{84}H_{114}Cl_3Ir_3N_{12}Si_3$ : Representation of central trimer without the three carbene units attached to the Ir atoms and the corresponding labels for the C atoms. For clarity the trimer is presented from three different perspectives.



**Table S14. Fractional Atomic Coordinates ( $\times 10^4$ ) and Equivalent Isotropic Displacement Parameters ( $\text{\AA}^2 \times 10^3$ ) for  $\text{C}_{84}\text{H}_{114}\text{Cl}_3\text{Ir}_3\text{N}_{12}\text{Si}_3$ .  $U_{\text{eq}}$  is defined as 1/3 of the trace of the orthogonalised  $U_{ij}$  tensor.**

| Atom | x       | y        | z          | U(eq)    |
|------|---------|----------|------------|----------|
| C1   | 2113(3) | 4274(4)  | 3985.3(16) | 18.3(11) |
| C2   | 1659(3) | 5650(4)  | 4043.5(19) | 30.6(14) |
| C3   | 2131(3) | 5730(4)  | 3782.0(19) | 29.9(14) |
| C4   | 1143(3) | 4425(4)  | 4415.2(19) | 28.9(14) |
| C5   | 576(3)  | 4118(4)  | 4208(2)    | 31.9(14) |
| C6   | 86(3)   | 3806(4)  | 4454(2)    | 40.5(17) |
| C7   | 158(4)  | 3816(5)  | 4898(2)    | 43.4(19) |
| C8   | 720(4)  | 4155(5)  | 5093(2)    | 44(2)    |
| C9   | 1225(4) | 4465(4)  | 4864(2)    | 37.1(16) |
| C10  | 493(3)  | 4097(5)  | 3722(2)    | 38.7(16) |
| C11  | -348(5) | 3484(6)  | 5170(3)    | 68(3)    |
| C12  | 1826(4) | 4844(6)  | 5073(2)    | 50(2)    |
| C13  | 2877(3) | 4731(4)  | 3446.1(19) | 28.0(13) |
| C14  | 2688(3) | 4428(4)  | 3031(2)    | 34.8(15) |
| C15  | 3157(4) | 4302(5)  | 2749(2)    | 42.5(17) |
| C16  | 3796(4) | 4505(6)  | 2861(3)    | 55(2)    |
| C17  | 3959(3) | 4812(5)  | 3271(3)    | 46.9(18) |
| C18  | 3510(3) | 4924(5)  | 3576(2)    | 35.8(15) |
| C19  | 2002(3) | 4237(5)  | 2897(2)    | 40.3(17) |
| C20  | 4292(5) | 4359(8)  | 2540(3)    | 78(3)    |
| C21  | 3706(4) | 5217(5)  | 4027(2)    | 44.1(17) |
| C22  | 2909(3) | 2335(4)  | 3269.4(17) | 23.0(12) |
| C23  | 3693(3) | 2752(4)  | 3780.8(18) | 25.6(12) |
| C24  | 4169(3) | 2370(4)  | 3551.4(19) | 28.1(13) |
| C25  | 3945(3) | 1957(4)  | 3158.9(18) | 24.6(12) |
| C26  | 5049(4) | 1890(9)  | 4318(3)    | 89(4)    |
| C27  | 5289(4) | 3571(6)  | 3818(3)    | 65(3)    |
| C28  | 5513(3) | 1750(5)  | 3403(3)    | 47.3(19) |
| C29  | 2618(3) | 1031(4)  | 1839.1(17) | 22.4(12) |
| C30  | 2330(3) | 1090(5)  | 1118(2)    | 37.5(16) |
| C31  | 2205(3) | 259(5)   | 1244.6(19) | 36.2(15) |
| C32  | 2650(3) | 2515(4)  | 1473.9(16) | 25.1(13) |
| C33  | 2148(3) | 3028(4)  | 1606.5(18) | 27.2(13) |
| C34  | 2210(3) | 3946(5)  | 1615(2)    | 34.1(15) |
| C35  | 2772(4) | 4352(5)  | 1504(2)    | 39.0(16) |
| C36  | 3256(3) | 3829(5)  | 1359(2)    | 37.9(16) |
| C37  | 3202(3) | 2901(4)  | 1340(2)    | 32.6(14) |
| C38  | 1551(3) | 2587(5)  | 1748(2)    | 34.7(15) |
| C39  | 2847(5) | 5362(5)  | 1547(3)    | 57(2)    |
| C40  | 3737(3) | 2330(5)  | 1194(2)    | 42.8(17) |
| C41  | 2246(3) | -546(4)  | 1936.2(19) | 29.9(13) |
| C42  | 1653(3) | -627(4)  | 2110.8(19) | 32.3(14) |
| C43  | 1535(4) | -1397(5) | 2344(2)    | 38.1(16) |
| C44  | 1992(4) | -2069(5) | 2403(2)    | 42.2(17) |
| C45  | 2564(4) | -1976(5) | 2213(2)    | 41.1(16) |
| C46  | 2712(3) | -1219(4) | 1977(2)    | 35.5(15) |
| C47  | 1162(3) | 94(5)    | 2065(2)    | 40.7(16) |
| C48  | 1853(5) | -2876(5) | 2680(3)    | 57(2)    |
| C49  | 3328(4) | -1131(5) | 1771(2)    | 45.0(18) |
| C50  | 2407(3) | -26(4)   | 2999.9(17) | 21.9(12) |

|     |            |            |            |          |
|-----|------------|------------|------------|----------|
| C51 | 3428(3)    | -390(4)    | 2874.9(18) | 24.9(12) |
| C52 | 3437(3)    | -1070(4)   | 3175.5(19) | 29.1(13) |
| C53 | 2883(3)    | -1174(4)   | 3384.4(19) | 25.4(12) |
| C54 | 4834(3)    | -952(6)    | 3449(3)    | 47.3(19) |
| C55 | 4371(4)    | -2330(5)   | 2785(3)    | 51(2)    |
| C56 | 4060(4)    | -2585(5)   | 3713(3)    | 53(2)    |
| C57 | 672(3)     | -820(3)    | 3889.0(16) | 17.7(11) |
| C58 | -350(3)    | -1222(4)   | 3986.5(19) | 27.4(13) |
| C59 | -135(3)    | -795(4)    | 4343.2(19) | 26.5(13) |
| C60 | 30(2)      | -1619(4)   | 3285.2(17) | 22.3(12) |
| C61 | -193(3)    | -1065(4)   | 2943.1(18) | 24.4(12) |
| C62 | -353(3)    | -1470(4)   | 2546.4(19) | 29.4(13) |
| C63 | -307(3)    | -2383(4)   | 2490.4(19) | 30.1(14) |
| C64 | -73(3)     | -2902(4)   | 2832(2)    | 29.7(13) |
| C65 | 97(3)      | -2534(4)   | 3237(2)    | 28.2(13) |
| C66 | -267(3)    | -86(4)     | 3007(2)    | 29.5(13) |
| C67 | -517(4)    | -2803(5)   | 2059(2)    | 51(2)    |
| C68 | 333(4)     | -3118(4)   | 3612(2)    | 40.7(17) |
| C69 | 831(3)     | 72(4)      | 4567.4(17) | 21.4(12) |
| C70 | 747(3)     | 987(4)     | 4491.0(17) | 23.5(12) |
| C71 | 1074(3)    | 1582(4)    | 4770.3(18) | 27.1(13) |
| C72 | 1477(3)    | 1291(4)    | 5110.5(19) | 28.6(14) |
| C73 | 1532(3)    | 388(5)     | 5185.7(18) | 28.5(14) |
| C74 | 1211(3)    | -254(4)    | 4922.9(18) | 24.9(12) |
| C75 | 325(3)     | 1319(4)    | 4114.2(19) | 32.4(14) |
| C76 | 1852(3)    | 1964(5)    | 5396(2)    | 41.8(18) |
| C77 | 1260(3)    | -1222(5)   | 5016(2)    | 37.5(16) |
| C78 | 2037(2)    | 1024(4)    | 4035.1(16) | 18.7(11) |
| C79 | 2893(3)    | 1295(4)    | 4511.7(17) | 22.3(12) |
| C80 | 2948(2)    | 399(4)     | 4601.3(17) | 20.0(11) |
| C81 | 2516(3)    | -159(4)    | 4383.7(17) | 20.9(11) |
| C82 | 3988(3)    | 928(6)     | 5286(2)    | 45.6(18) |
| C83 | 4160(4)    | -690(6)    | 4692(3)    | 55(2)    |
| C84 | 3210(4)    | -764(6)    | 5396(2)    | 49(2)    |
| Cl1 | 3102.2(7)  | 3394.1(10) | 4703.7(4)  | 29.8(3)  |
| Cl2 | 4083.9(7)  | 1037.9(11) | 2224.4(5)  | 30.6(3)  |
| Cl3 | 1898.2(6)  | -2098.6(9) | 4022.3(4)  | 25.1(3)  |
| Ir1 | 2302.3(2)  | 2998.2(2)  | 4087.3(2)  | 19.04(7) |
| Ir2 | 2972.1(2)  | 1397.5(2)  | 2418.7(2)  | 20.47(7) |
| Ir3 | 1501.5(2)  | -730.0(2)  | 3629.0(2)  | 17.41(6) |
| N1  | 1636(2)    | 4757(3)    | 4163.6(15) | 25.2(10) |
| N2  | 2394(2)    | 4894(3)    | 3741.2(15) | 26.4(11) |
| N3  | 3069(2)    | 2733(3)    | 3648.9(14) | 20.5(10) |
| N4  | 3328(2)    | 1951(3)    | 3022.1(14) | 21.7(10) |
| N5  | 2573(2)    | 1565(3)    | 1479.0(14) | 22.9(10) |
| N6  | 2377(2)    | 228(3)     | 1685.3(15) | 27.9(11) |
| N7  | 2916(2)    | 134(3)     | 2782.6(14) | 19.8(9)  |
| N8  | 2360(2)    | -657(3)    | 3298.5(14) | 20.7(10) |
| N9  | 130(2)     | -1239(3)   | 3708.9(15) | 22(1)    |
| N10 | 490(2)     | -540(3)    | 4280.4(14) | 21.3(10) |
| N11 | 2053.8(19) | 141(3)     | 4090.8(14) | 18.3(9)  |
| N12 | 2423(2)    | 1627(3)    | 4218.5(15) | 21(1)    |
| Si1 | 5025.2(8)  | 2386.0(15) | 3770.8(6)  | 37.9(4)  |

|     |           |             |           |         |
|-----|-----------|-------------|-----------|---------|
| Si2 | 4186.1(8) | -1762.8(13) | 3284.8(6) | 34.3(4) |
| Si3 | 3597.3(8) | -48.5(13)   | 5002.1(5) | 30.3(4) |

**Table S15. Anisotropic Displacement Parameters ( $\text{\AA}^2 \times 10^3$ ) for  $\text{C}_{84}\text{H}_{114}\text{Cl}_3\text{Ir}_3\text{N}_{12}\text{Si}_3$ . The anisotropic displacement factor exponent takes the form:  $-2\pi^2[h^2a^*U_{11}+2hka^*b^*U_{12}+\dots]$ .**

| Atom | $U_{11}$ | $U_{22}$ | $U_{33}$ | $U_{23}$ | $U_{13}$ | $U_{12}$ |
|------|----------|----------|----------|----------|----------|----------|
| C1   | 26(3)    | 18(3)    | 12(2)    | -5(2)    | 4(2)     | -7(2)    |
| C2   | 42(4)    | 24(3)    | 26(3)    | 4(2)     | 3(3)     | 6(3)     |
| C3   | 42(4)    | 21(3)    | 27(3)    | 5(2)     | -1(3)    | 2(3)     |
| C4   | 39(3)    | 23(3)    | 26(3)    | 4(2)     | 13(3)    | 11(3)    |
| C5   | 38(4)    | 23(3)    | 36(3)    | 3(3)     | 12(3)    | 7(3)     |
| C6   | 39(4)    | 23(3)    | 61(5)    | 0(3)     | 15(3)    | 4(3)     |
| C7   | 58(5)    | 24(4)    | 51(4)    | 9(3)     | 31(4)    | 16(3)    |
| C8   | 80(6)    | 30(4)    | 27(3)    | 10(3)    | 29(4)    | 24(4)    |
| C9   | 52(4)    | 31(4)    | 30(3)    | -3(3)    | 11(3)    | 19(3)    |
| C10  | 34(4)    | 42(4)    | 40(4)    | -2(3)    | -2(3)    | -2(3)    |
| C11  | 84(7)    | 44(5)    | 83(6)    | 14(5)    | 54(6)    | 17(5)    |
| C12  | 67(5)    | 57(5)    | 25(3)    | -3(3)    | 1(3)     | 21(4)    |
| C13  | 33(3)    | 22(3)    | 30(3)    | 5(2)     | 7(3)     | -2(3)    |
| C14  | 50(4)    | 25(3)    | 31(3)    | 8(3)     | 10(3)    | -4(3)    |
| C15  | 59(5)    | 36(4)    | 34(4)    | 3(3)     | 15(3)    | 3(3)     |
| C16  | 51(5)    | 63(6)    | 54(5)    | 15(4)    | 26(4)    | 13(4)    |
| C17  | 32(4)    | 53(5)    | 56(5)    | 12(4)    | 3(3)     | -3(3)    |
| C18  | 36(4)    | 32(4)    | 41(4)    | 9(3)     | 9(3)     | -8(3)    |
| C19  | 47(4)    | 46(4)    | 28(3)    | 6(3)     | -1(3)    | -9(3)    |
| C20  | 59(6)    | 108(9)   | 73(6)    | 8(6)     | 35(5)    | 13(6)    |
| C21  | 42(4)    | 41(4)    | 48(4)    | 11(3)    | -4(3)    | -11(3)   |
| C22  | 22(3)    | 27(3)    | 20(3)    | 5(2)     | 2(2)     | 4(2)     |
| C23  | 26(3)    | 25(3)    | 25(3)    | -3(2)    | -4(2)    | -2(2)    |
| C24  | 23(3)    | 34(3)    | 27(3)    | 7(3)     | -1(2)    | -1(3)    |
| C25  | 17(3)    | 36(3)    | 21(3)    | 4(2)     | -1(2)    | 3(2)     |
| C26  | 39(5)    | 163(12)  | 63(6)    | 40(7)    | -2(4)    | 17(6)    |
| C27  | 32(4)    | 74(6)    | 89(7)    | -33(5)   | 3(4)     | -11(4)   |
| C28  | 23(3)    | 48(5)    | 71(5)    | -2(4)    | 9(3)     | 4(3)     |
| C29  | 22(3)    | 25(3)    | 20(3)    | 7(2)     | -1(2)    | 5(2)     |
| C30  | 49(4)    | 38(4)    | 24(3)    | 3(3)     | -8(3)    | 1(3)     |
| C31  | 51(4)    | 34(4)    | 22(3)    | 1(3)     | -5(3)    | 0(3)     |
| C32  | 23(3)    | 40(4)    | 12(2)    | 7(2)     | -3(2)    | 3(3)     |
| C33  | 28(3)    | 31(3)    | 22(3)    | 6(2)     | -1(2)    | 3(3)     |
| C34  | 39(4)    | 37(4)    | 26(3)    | 7(3)     | 1(3)     | 11(3)    |
| C35  | 49(4)    | 35(4)    | 32(3)    | 2(3)     | -2(3)    | -7(3)    |
| C36  | 33(4)    | 49(4)    | 31(3)    | 7(3)     | -1(3)    | -9(3)    |
| C37  | 34(3)    | 36(4)    | 27(3)    | 8(3)     | 2(3)     | -1(3)    |
| C38  | 23(3)    | 41(4)    | 38(3)    | 14(3)    | -4(3)    | 13(3)    |
| C39  | 76(6)    | 42(5)    | 53(5)    | 1(4)     | 12(4)    | -13(4)   |
| C40  | 32(4)    | 50(4)    | 47(4)    | 14(4)    | 10(3)    | -1(3)    |
| C41  | 41(4)    | 24(3)    | 24(3)    | 1(2)     | -3(3)    | -2(3)    |
| C42  | 43(4)    | 30(3)    | 23(3)    | -2(3)    | -1(3)    | -2(3)    |
| C43  | 46(4)    | 38(4)    | 30(3)    | -4(3)    | 4(3)     | -9(3)    |
| C44  | 62(5)    | 33(4)    | 31(3)    | 4(3)     | 5(3)     | -6(3)    |
| C45  | 52(4)    | 28(4)    | 42(4)    | 0(3)     | -3(3)    | 5(3)     |
| C46  | 46(4)    | 30(4)    | 30(3)    | -1(3)    | 2(3)     | 2(3)     |
| C47  | 36(4)    | 41(4)    | 45(4)    | -2(3)    | 1(3)     | 2(3)     |

|     |           |           |           |          |          |          |
|-----|-----------|-----------|-----------|----------|----------|----------|
| C48 | 87(7)     | 32(4)     | 52(5)     | 11(4)    | 11(4)    | -7(4)    |
| C49 | 46(4)     | 44(4)     | 45(4)     | 3(3)     | 7(3)     | 13(3)    |
| C50 | 18(3)     | 27(3)     | 20(3)     | -1(2)    | -1(2)    | 1(2)     |
| C51 | 22(3)     | 28(3)     | 25(3)     | 4(2)     | 7(2)     | 7(2)     |
| C52 | 26(3)     | 33(3)     | 29(3)     | 6(3)     | 7(2)     | 6(3)     |
| C53 | 20(3)     | 27(3)     | 30(3)     | 4(2)     | 8(2)     | 5(2)     |
| C54 | 25(3)     | 63(5)     | 54(4)     | 10(4)    | 1(3)     | -1(3)    |
| C55 | 49(5)     | 44(4)     | 62(5)     | -2(4)    | 15(4)    | 20(4)    |
| C56 | 55(5)     | 38(4)     | 67(5)     | 26(4)    | 7(4)     | 17(4)    |
| C57 | 24(3)     | 11(3)     | 18(2)     | 3(2)     | 1(2)     | 1(2)     |
| C58 | 16(3)     | 35(4)     | 32(3)     | -7(3)    | 8(2)     | -8(2)    |
| C59 | 17(3)     | 39(4)     | 25(3)     | -3(3)    | 13(2)    | -4(2)    |
| C60 | 13(2)     | 32(3)     | 21(3)     | -6(2)    | 0(2)     | -5(2)    |
| C61 | 19(3)     | 31(3)     | 24(3)     | 1(2)     | -1(2)    | 1(2)     |
| C62 | 29(3)     | 35(4)     | 23(3)     | 1(3)     | -6(2)    | -1(3)    |
| C63 | 27(3)     | 35(4)     | 27(3)     | -8(3)    | -4(2)    | 3(3)     |
| C64 | 32(3)     | 21(3)     | 35(3)     | -7(3)    | -3(3)    | 3(3)     |
| C65 | 21(3)     | 29(3)     | 33(3)     | -1(3)    | -5(2)    | -1(2)    |
| C66 | 28(3)     | 26(3)     | 33(3)     | 3(3)     | -9(3)    | -3(3)    |
| C67 | 71(5)     | 47(5)     | 32(4)     | -11(3)   | -13(4)   | 4(4)     |
| C68 | 47(4)     | 26(4)     | 46(4)     | 1(3)     | -17(3)   | -1(3)    |
| C69 | 18(3)     | 28(3)     | 19(3)     | -5(2)    | 3(2)     | -5(2)    |
| C70 | 27(3)     | 25(3)     | 19(3)     | 0(2)     | 4(2)     | -2(2)    |
| C71 | 32(3)     | 27(3)     | 23(3)     | -3(2)    | 12(2)    | -8(3)    |
| C72 | 20(3)     | 43(4)     | 24(3)     | -11(3)   | 7(2)     | -11(3)   |
| C73 | 15(3)     | 55(4)     | 15(3)     | -4(3)    | 1(2)     | 1(3)     |
| C74 | 16(3)     | 38(4)     | 21(3)     | -5(2)    | 4(2)     | 1(2)     |
| C75 | 39(4)     | 33(4)     | 25(3)     | 2(3)     | -1(3)    | 6(3)     |
| C76 | 34(4)     | 58(5)     | 34(4)     | -17(3)   | 4(3)     | -17(3)   |
| C77 | 46(4)     | 39(4)     | 29(3)     | 2(3)     | 6(3)     | 9(3)     |
| C78 | 15(2)     | 22(3)     | 18(2)     | 0(2)     | -2(2)    | 3(2)     |
| C79 | 15(3)     | 29(3)     | 22(3)     | -1(2)    | 0(2)     | -2(2)    |
| C80 | 11(2)     | 28(3)     | 21(3)     | 2(2)     | 2(2)     | 3(2)     |
| C81 | 20(3)     | 21(3)     | 23(3)     | 4(2)     | 5(2)     | 2(2)     |
| C82 | 29(3)     | 71(5)     | 34(4)     | 0(4)     | -17(3)   | -8(4)    |
| C83 | 47(4)     | 75(6)     | 44(4)     | 3(4)     | 2(4)     | 31(4)    |
| C84 | 44(4)     | 61(5)     | 40(4)     | 19(4)    | -5(3)    | 13(4)    |
| Cl1 | 34.5(7)   | 29.3(8)   | 24.5(7)   | -2.6(6)  | -6.0(6)  | -5.7(6)  |
| Cl2 | 23.6(7)   | 39.7(8)   | 29.3(7)   | 3.6(6)   | 8.1(6)   | 3.7(6)   |
| Cl3 | 25.2(7)   | 19.4(7)   | 31.2(7)   | 2.4(5)   | 6.0(5)   | 1.7(5)   |
| lr1 | 20.03(12) | 17.28(12) | 19.70(12) | -0.27(9) | 0.78(9)  | 0.49(9)  |
| lr2 | 19.65(12) | 24.90(13) | 16.94(11) | 3.36(9)  | 1.90(9)  | 4.16(9)  |
| lr3 | 14.21(11) | 19.23(13) | 18.97(11) | -0.47(9) | 2.58(8)  | -0.87(9) |
| N1  | 34(3)     | 20(3)     | 22(2)     | 0.0(19)  | 4(2)     | 5(2)     |
| N2  | 28(3)     | 24(3)     | 28(2)     | 3(2)     | 5(2)     | -1(2)    |
| N3  | 21(2)     | 23(2)     | 18(2)     | 1.6(19)  | 1.7(18)  | -2.0(19) |
| N4  | 20(2)     | 26(3)     | 19(2)     | 8.2(19)  | -0.3(18) | 4.8(19)  |
| N5  | 23(2)     | 29(3)     | 15(2)     | 2.1(19)  | -4.1(18) | 6(2)     |
| N6  | 36(3)     | 28(3)     | 20(2)     | 2(2)     | -1(2)    | 0(2)     |
| N7  | 19(2)     | 23(2)     | 18(2)     | 4.5(19)  | 4.6(18)  | 4.8(19)  |
| N8  | 21(2)     | 20(2)     | 22(2)     | 2.0(19)  | 5.7(18)  | 3.2(19)  |
| N9  | 19(2)     | 25(3)     | 22(2)     | -6(2)    | 1.2(18)  | -1.5(19) |
| N10 | 18(2)     | 25(3)     | 21(2)     | -2.9(19) | 3.1(18)  | -5.8(19) |

|     |         |          |          |          |          |          |
|-----|---------|----------|----------|----------|----------|----------|
| N11 | 9(2)    | 26(3)    | 20(2)    | -3.6(19) | -4.9(16) | -0.9(18) |
| N12 | 22(2)   | 16(2)    | 26(2)    | -8.2(19) | 7.5(19)  | -2.5(19) |
| Si1 | 19.4(8) | 61.8(13) | 32.1(9)  | 5.6(9)   | -0.2(7)  | 1.8(8)   |
| Si2 | 25.8(8) | 36.1(10) | 42.1(10) | 12.6(8)  | 9.9(7)   | 11.5(7)  |
| Si3 | 19.3(8) | 45.1(11) | 25.7(8)  | 5.0(7)   | -3.4(6)  | 6.5(7)   |

Table S16. Bond Lengths for  $C_{84}H_{114}Cl_3Ir_3N_{12}Si_3$ .

| Atom | Atom | Length/Å  | Atom | Atom | Length/Å  |
|------|------|-----------|------|------|-----------|
| C1   | Ir1  | 1.973(5)  | C44  | C48  | 1.526(9)  |
| C1   | N1   | 1.385(7)  | C45  | C46  | 1.399(10) |
| C1   | N2   | 1.361(7)  | C46  | C49  | 1.489(10) |
| C2   | C3   | 1.333(9)  | C50  | N7   | 1.327(7)  |
| C2   | N1   | 1.389(8)  | C50  | N8   | 1.333(7)  |
| C3   | N2   | 1.379(8)  | C51  | C52  | 1.382(8)  |
| C4   | C5   | 1.390(10) | C51  | N7   | 1.345(7)  |
| C4   | C9   | 1.397(9)  | C52  | C53  | 1.382(8)  |
| C4   | N1   | 1.431(8)  | C52  | Si2  | 1.894(6)  |
| C5   | C6   | 1.404(9)  | C53  | N8   | 1.354(7)  |
| C5   | C10  | 1.509(9)  | C54  | Si2  | 1.867(8)  |
| C6   | C7   | 1.380(11) | C55  | Si2  | 1.839(8)  |
| C7   | C8   | 1.383(12) | C56  | Si2  | 1.847(7)  |
| C7   | C11  | 1.491(10) | C57  | Ir3  | 1.978(5)  |
| C8   | C9   | 1.398(10) | C57  | N9   | 1.382(7)  |
| C9   | C12  | 1.489(11) | C57  | N10  | 1.368(7)  |
| C13  | C14  | 1.398(9)  | C58  | C59  | 1.331(8)  |
| C13  | C18  | 1.392(9)  | C58  | N9   | 1.374(7)  |
| C13  | N2   | 1.437(7)  | C59  | N10  | 1.393(7)  |
| C14  | C15  | 1.379(9)  | C60  | C61  | 1.403(8)  |
| C14  | C19  | 1.497(10) | C60  | C65  | 1.387(9)  |
| C15  | C16  | 1.396(12) | C60  | N9   | 1.436(7)  |
| C16  | C17  | 1.375(12) | C61  | C62  | 1.394(8)  |
| C16  | C20  | 1.509(10) | C61  | C66  | 1.488(8)  |
| C17  | C18  | 1.395(10) | C62  | C63  | 1.383(9)  |
| C18  | C21  | 1.498(10) | C63  | C64  | 1.378(9)  |
| C22  | N3   | 1.343(7)  | C63  | C67  | 1.517(8)  |
| C22  | N4   | 1.339(7)  | C64  | C65  | 1.399(8)  |
| C23  | C24  | 1.392(8)  | C65  | C68  | 1.512(9)  |
| C23  | N3   | 1.345(7)  | C69  | C70  | 1.399(8)  |
| C24  | C25  | 1.418(8)  | C69  | C74  | 1.403(8)  |
| C24  | Si1  | 1.877(6)  | C69  | N10  | 1.435(7)  |
| C25  | N4   | 1.335(7)  | C70  | C71  | 1.390(8)  |
| C26  | Si1  | 1.854(9)  | C70  | C75  | 1.502(8)  |
| C27  | Si1  | 1.862(9)  | C71  | C72  | 1.377(9)  |
| C28  | Si1  | 1.853(7)  | C72  | C73  | 1.377(9)  |
| C29  | Ir2  | 1.978(6)  | C72  | C76  | 1.524(8)  |
| C29  | N5   | 1.374(7)  | C73  | C74  | 1.402(8)  |
| C29  | N6   | 1.377(8)  | C74  | C77  | 1.480(9)  |
| C30  | C31  | 1.337(10) | C78  | N11  | 1.334(7)  |
| C30  | N5   | 1.394(8)  | C78  | N12  | 1.316(7)  |
| C31  | N6   | 1.392(7)  | C79  | C80  | 1.375(8)  |
| C32  | C33  | 1.390(8)  | C79  | N12  | 1.386(7)  |
| C32  | C37  | 1.385(8)  | C80  | C81  | 1.374(8)  |

|     |     |           |     |     |            |
|-----|-----|-----------|-----|-----|------------|
| C32 | N5  | 1.433(8)  | C80 | Si3 | 1.901(5)   |
| C33 | C34 | 1.381(9)  | C81 | N11 | 1.358(7)   |
| C33 | C38 | 1.512(9)  | C82 | Si3 | 1.868(7)   |
| C34 | C35 | 1.394(10) | C83 | Si3 | 1.848(7)   |
| C35 | C36 | 1.382(10) | C84 | Si3 | 1.858(7)   |
| C35 | C39 | 1.527(10) | Cl1 | Ir1 | 2.5264(14) |
| C36 | C37 | 1.396(10) | Cl2 | Ir2 | 2.5118(14) |
| C37 | C40 | 1.507(9)  | Cl3 | Ir3 | 2.4990(13) |
| C41 | C42 | 1.399(9)  | Ir1 | N3  | 2.219(4)   |
| C41 | C46 | 1.404(9)  | Ir1 | N12 | 2.106(5)   |
| C41 | N6  | 1.435(8)  | Ir2 | N4  | 2.136(5)   |
| C42 | C43 | 1.394(9)  | Ir2 | N7  | 2.213(4)   |
| C42 | C47 | 1.493(9)  | Ir3 | N8  | 2.142(4)   |
| C43 | C44 | 1.394(10) | Ir3 | N11 | 2.207(4)   |
| C44 | C45 | 1.381(10) |     |     |            |

**Table S17. Bond Angles for C<sub>84</sub>H<sub>114</sub>Cl<sub>3</sub>Ir<sub>3</sub>N<sub>12</sub>Si<sub>3</sub>.**

| Atom | Atom | Atom | Angle/°  | Atom | Atom | Atom | Angle/°    |
|------|------|------|----------|------|------|------|------------|
| N1   | C1   | Ir1  | 125.8(4) | C60  | C65  | C68  | 121.3(5)   |
| N2   | C1   | Ir1  | 131.3(4) | C64  | C65  | C68  | 121.0(6)   |
| N2   | C1   | N1   | 102.9(5) | C70  | C69  | C74  | 122.1(5)   |
| C3   | C2   | N1   | 107.1(5) | C70  | C69  | N10  | 117.9(5)   |
| C2   | C3   | N2   | 107.1(5) | C74  | C69  | N10  | 119.9(5)   |
| C5   | C4   | C9   | 121.1(6) | C69  | C70  | C75  | 121.1(5)   |
| C5   | C4   | N1   | 119.4(5) | C71  | C70  | C69  | 118.1(5)   |
| C9   | C4   | N1   | 119.3(6) | C71  | C70  | C75  | 120.8(6)   |
| C4   | C5   | C6   | 119.7(6) | C72  | C71  | C70  | 121.7(6)   |
| C4   | C5   | C10  | 120.2(6) | C71  | C72  | C73  | 118.7(5)   |
| C6   | C5   | C10  | 120.1(6) | C71  | C72  | C76  | 120.1(6)   |
| C7   | C6   | C5   | 120.6(7) | C73  | C72  | C76  | 121.1(6)   |
| C6   | C7   | C8   | 118.1(6) | C72  | C73  | C74  | 122.9(6)   |
| C6   | C7   | C11  | 122.3(8) | C69  | C74  | C77  | 121.5(5)   |
| C8   | C7   | C11  | 119.6(8) | C73  | C74  | C69  | 116.3(6)   |
| C7   | C8   | C9   | 123.6(6) | C73  | C74  | C77  | 122.3(6)   |
| C4   | C9   | C8   | 116.8(7) | N12  | C78  | N11  | 127.9(5)   |
| C4   | C9   | C12  | 119.5(6) | C80  | C79  | N12  | 121.9(5)   |
| C8   | C9   | C12  | 123.7(6) | C79  | C80  | Si3  | 121.5(4)   |
| C14  | C13  | N2   | 118.6(6) | C81  | C80  | C79  | 116.8(5)   |
| C18  | C13  | C14  | 122.5(6) | C81  | C80  | Si3  | 121.7(4)   |
| C18  | C13  | N2   | 118.9(6) | N11  | C81  | C80  | 122.9(5)   |
| C13  | C14  | C19  | 121.5(6) | C1   | Ir1  | Cl1  | 90.56(15)  |
| C15  | C14  | C13  | 117.7(7) | C1   | Ir1  | N3   | 102.77(19) |
| C15  | C14  | C19  | 120.8(6) | C1   | Ir1  | N12  | 174.85(19) |
| C14  | C15  | C16  | 121.9(7) | N3   | Ir1  | Cl1  | 92.09(12)  |
| C15  | C16  | C20  | 120.0(8) | N12  | Ir1  | Cl1  | 91.02(13)  |
| C17  | C16  | C15  | 118.3(7) | N12  | Ir1  | N3   | 82.07(17)  |
| C17  | C16  | C20  | 121.6(8) | C29  | Ir2  | Cl2  | 90.92(16)  |
| C16  | C17  | C18  | 122.5(7) | C29  | Ir2  | N4   | 173.2(2)   |
| C13  | C18  | C17  | 117.1(6) | C29  | Ir2  | N7   | 101.4(2)   |
| C13  | C18  | C21  | 121.6(6) | N4   | Ir2  | Cl2  | 91.31(13)  |
| C17  | C18  | C21  | 121.4(7) | N4   | Ir2  | N7   | 84.88(17)  |
| N4   | C22  | N3   | 124.3(5) | N7   | Ir2  | Cl2  | 91.39(12)  |

|     |     |     |          |     |     |     |            |
|-----|-----|-----|----------|-----|-----|-----|------------|
| N3  | C23 | C24 | 123.7(5) | C57 | Ir3 | C13 | 90.92(15)  |
| C23 | C24 | C25 | 114.5(5) | C57 | Ir3 | N8  | 175.37(19) |
| C23 | C24 | Si1 | 120.8(5) | C57 | Ir3 | N11 | 102.21(19) |
| C25 | C24 | Si1 | 124.6(5) | N8  | Ir3 | C13 | 90.84(12)  |
| N4  | C25 | C24 | 122.1(5) | N8  | Ir3 | N11 | 82.03(17)  |
| N5  | C29 | Ir2 | 125.5(4) | N11 | Ir3 | C13 | 91.47(12)  |
| N5  | C29 | N6  | 102.9(5) | C1  | N1  | C2  | 110.8(5)   |
| N6  | C29 | Ir2 | 131.6(4) | C1  | N1  | C4  | 127.6(5)   |
| C31 | C30 | N5  | 107.9(5) | C2  | N1  | C4  | 121.5(5)   |
| C30 | C31 | N6  | 106.1(6) | C1  | N2  | C3  | 112.1(5)   |
| C33 | C32 | N5  | 117.2(5) | C1  | N2  | C13 | 126.5(5)   |
| C37 | C32 | C33 | 121.8(6) | C3  | N2  | C13 | 121.2(5)   |
| C37 | C32 | N5  | 121.0(5) | C22 | N3  | C23 | 117.0(5)   |
| C32 | C33 | C38 | 120.6(6) | C22 | N3  | Ir1 | 118.2(4)   |
| C34 | C33 | C32 | 119.0(6) | C23 | N3  | Ir1 | 122.9(4)   |
| C34 | C33 | C38 | 120.5(6) | C22 | N4  | Ir2 | 118.0(4)   |
| C33 | C34 | C35 | 120.5(6) | C25 | N4  | C22 | 118.5(5)   |
| C34 | C35 | C39 | 119.6(7) | C25 | N4  | Ir2 | 123.5(4)   |
| C36 | C35 | C34 | 119.3(6) | C29 | N5  | C30 | 111.0(5)   |
| C36 | C35 | C39 | 121.1(7) | C29 | N5  | C32 | 125.9(5)   |
| C35 | C36 | C37 | 121.3(6) | C30 | N5  | C32 | 122.2(5)   |
| C32 | C37 | C36 | 118.0(6) | C29 | N6  | C31 | 112.0(5)   |
| C32 | C37 | C40 | 120.8(6) | C29 | N6  | C41 | 126.6(5)   |
| C36 | C37 | C40 | 121.2(6) | C31 | N6  | C41 | 121.1(5)   |
| C42 | C41 | C46 | 122.4(6) | C50 | N7  | C51 | 116.5(5)   |
| C42 | C41 | N6  | 119.5(6) | C50 | N7  | Ir2 | 119.3(4)   |
| C46 | C41 | N6  | 118.0(6) | C51 | N7  | Ir2 | 122.5(4)   |
| C41 | C42 | C47 | 121.9(6) | C50 | N8  | C53 | 116.3(5)   |
| C43 | C42 | C41 | 118.1(6) | C50 | N8  | Ir3 | 118.6(4)   |
| C43 | C42 | C47 | 120.0(6) | C53 | N8  | Ir3 | 125.1(4)   |
| C42 | C43 | C44 | 121.3(7) | C57 | N9  | C60 | 127.8(4)   |
| C43 | C44 | C48 | 119.2(7) | C58 | N9  | C57 | 110.9(4)   |
| C45 | C44 | C43 | 118.9(6) | C58 | N9  | C60 | 121.3(5)   |
| C45 | C44 | C48 | 121.9(7) | C57 | N10 | C59 | 111.5(5)   |
| C44 | C45 | C46 | 122.6(7) | C57 | N10 | C69 | 126.2(4)   |
| C41 | C46 | C49 | 121.2(6) | C59 | N10 | C69 | 121.4(5)   |
| C45 | C46 | C41 | 116.7(6) | C78 | N11 | C81 | 115.2(5)   |
| C45 | C46 | C49 | 122.1(6) | C78 | N11 | Ir3 | 119.6(3)   |
| N7  | C50 | N8  | 125.9(5) | C81 | N11 | Ir3 | 123.8(4)   |
| N7  | C51 | C52 | 123.1(5) | C78 | N12 | C79 | 115.2(5)   |
| C51 | C52 | C53 | 115.5(5) | C78 | N12 | Ir1 | 121.6(4)   |
| C51 | C52 | Si2 | 119.7(4) | C79 | N12 | Ir1 | 123.2(4)   |
| C53 | C52 | Si2 | 124.8(5) | C26 | Si1 | C24 | 106.8(3)   |
| N8  | C53 | C52 | 122.8(5) | C26 | Si1 | C27 | 108.8(5)   |
| N9  | C57 | Ir3 | 126.1(4) | C27 | Si1 | C24 | 108.3(3)   |
| N10 | C57 | Ir3 | 130.8(4) | C28 | Si1 | C24 | 109.1(3)   |
| N10 | C57 | N9  | 103.0(4) | C28 | Si1 | C26 | 112.4(5)   |
| C59 | C58 | N9  | 108.2(5) | C28 | Si1 | C27 | 111.3(4)   |
| C58 | C59 | N10 | 106.3(5) | C54 | Si2 | C52 | 105.8(3)   |
| C61 | C60 | N9  | 118.7(5) | C55 | Si2 | C52 | 108.9(3)   |
| C65 | C60 | C61 | 122.3(5) | C55 | Si2 | C54 | 109.7(4)   |
| C65 | C60 | N9  | 118.7(5) | C55 | Si2 | C56 | 110.6(4)   |
| C60 | C61 | C66 | 120.9(5) | C56 | Si2 | C52 | 109.6(3)   |

|     |     |     |          |     |     |     |          |
|-----|-----|-----|----------|-----|-----|-----|----------|
| C62 | C61 | C60 | 117.3(6) | C56 | Si2 | C54 | 112.1(4) |
| C62 | C61 | C66 | 121.7(5) | C82 | Si3 | C80 | 107.7(3) |
| C63 | C62 | C61 | 121.9(6) | C83 | Si3 | C80 | 107.2(3) |
| C62 | C63 | C67 | 120.2(6) | C83 | Si3 | C82 | 112.2(4) |
| C64 | C63 | C62 | 119.0(5) | C83 | Si3 | C84 | 111.8(4) |
| C64 | C63 | C67 | 120.8(6) | C84 | Si3 | C80 | 107.9(3) |
| C63 | C64 | C65 | 121.7(6) | C84 | Si3 | C82 | 109.8(4) |
| C60 | C65 | C64 | 117.7(6) |     |     |     |          |

**Table S18. Torsion Angles for  $C_{84}H_{114}Cl_3Ir_3N_{12}Si_3$ .**

| A   | B   | C   | D   | Angle/°   | A   | B   | C   | D   | Angle/°   |
|-----|-----|-----|-----|-----------|-----|-----|-----|-----|-----------|
| C2  | C3  | N2  | C1  | -2.2(7)   | C61 | C62 | C63 | C67 | 177.0(6)  |
| C2  | C3  | N2  | C13 | 173.9(5)  | C62 | C63 | C64 | C65 | 2.5(10)   |
| C3  | C2  | N1  | C1  | 1.8(7)    | C63 | C64 | C65 | C60 | -0.9(9)   |
| C3  | C2  | N1  | C4  | -174.4(5) | C63 | C64 | C65 | C68 | 177.9(6)  |
| C4  | C5  | C6  | C7  | 1.1(10)   | C65 | C60 | C61 | C62 | 0.5(8)    |
| C5  | C4  | C9  | C8  | 2.1(9)    | C65 | C60 | C61 | C66 | 179.2(5)  |
| C5  | C4  | C9  | C12 | -176.7(6) | C65 | C60 | N9  | C57 | 99.2(7)   |
| C5  | C4  | N1  | C1  | -86.9(7)  | C65 | C60 | N9  | C58 | -84.0(7)  |
| C5  | C4  | N1  | C2  | 88.7(7)   | C66 | C61 | C62 | C63 | -177.5(6) |
| C5  | C6  | C7  | C8  | 1.0(10)   | C67 | C63 | C64 | C65 | -177.2(6) |
| C5  | C6  | C7  | C11 | -179.5(6) | C69 | C70 | C71 | C72 | 0.8(8)    |
| C6  | C7  | C8  | C9  | -1.7(10)  | C70 | C69 | C74 | C73 | -3.5(8)   |
| C7  | C8  | C9  | C4  | 0.2(10)   | C70 | C69 | C74 | C77 | 175.8(5)  |
| C7  | C8  | C9  | C12 | 178.9(7)  | C70 | C69 | N10 | C57 | 83.0(7)   |
| C9  | C4  | C5  | C6  | -2.8(9)   | C70 | C69 | N10 | C59 | -85.4(7)  |
| C9  | C4  | C5  | C10 | 178.7(6)  | C70 | C71 | C72 | C73 | -3.1(8)   |
| C9  | C4  | N1  | C1  | 97.0(7)   | C70 | C71 | C72 | C76 | 176.9(5)  |
| C9  | C4  | N1  | C2  | -87.4(7)  | C71 | C72 | C73 | C74 | 2.1(8)    |
| C10 | C5  | C6  | C7  | 179.6(6)  | C72 | C73 | C74 | C69 | 1.1(8)    |
| C11 | C7  | C8  | C9  | 178.8(6)  | C72 | C73 | C74 | C77 | -178.1(5) |
| C13 | C14 | C15 | C16 | -2.7(10)  | C74 | C69 | C70 | C71 | 2.6(8)    |
| C14 | C13 | C18 | C17 | 0.7(10)   | C74 | C69 | C70 | C75 | -178.4(5) |
| C14 | C13 | C18 | C21 | -177.7(6) | C74 | C69 | N10 | C57 | -99.9(6)  |
| C14 | C13 | N2  | C1  | 82.1(8)   | C74 | C69 | N10 | C59 | 91.6(7)   |
| C14 | C13 | N2  | C3  | -93.4(7)  | C75 | C70 | C71 | C72 | -178.2(5) |
| C14 | C15 | C16 | C17 | 2.1(12)   | C76 | C72 | C73 | C74 | -177.9(5) |
| C14 | C15 | C16 | C20 | -179.9(8) | C79 | C80 | C81 | N11 | 0.4(8)    |
| C15 | C16 | C17 | C18 | 0.1(12)   | C80 | C79 | N12 | C78 | 0.2(7)    |
| C16 | C17 | C18 | C13 | -1.4(11)  | C80 | C79 | N12 | Ir1 | 177.9(4)  |
| C16 | C17 | C18 | C21 | 177.0(7)  | C80 | C81 | N11 | C78 | -1.6(7)   |
| C18 | C13 | C14 | C15 | 1.3(10)   | C80 | C81 | N11 | Ir3 | 165.2(4)  |
| C18 | C13 | C14 | C19 | -179.1(6) | Ir1 | C1  | N1  | C2  | 176.5(4)  |
| C18 | C13 | N2  | C1  | -101.2(7) | Ir1 | C1  | N1  | C4  | -7.5(8)   |
| C18 | C13 | N2  | C3  | 83.4(7)   | Ir1 | C1  | N2  | C3  | -176.3(4) |
| C19 | C14 | C15 | C16 | 177.7(7)  | Ir1 | C1  | N2  | C13 | 7.9(9)    |
| C20 | C16 | C17 | C18 | -177.9(8) | Ir2 | C29 | N5  | C30 | 177.0(4)  |
| C23 | C24 | C25 | N4  | 0.9(9)    | Ir2 | C29 | N5  | C32 | -13.6(8)  |
| C23 | C24 | Si1 | C26 | 54.1(7)   | Ir2 | C29 | N6  | C31 | -177.1(5) |
| C23 | C24 | Si1 | C27 | -62.9(6)  | Ir2 | C29 | N6  | C41 | 8.8(9)    |
| C23 | C24 | Si1 | C28 | 175.9(5)  | Ir3 | C57 | N9  | C58 | 176.5(4)  |
| C24 | C23 | N3  | C22 | -1.3(9)   | Ir3 | C57 | N9  | C60 | -6.5(8)   |



|     |     |     |     |           |     |     |     |     |           |
|-----|-----|-----|-----|-----------|-----|-----|-----|-----|-----------|
| C24 | C23 | N3  | Ir1 | 162.6(5)  | Ir3 | C57 | N10 | C59 | -176.0(4) |
| C24 | C25 | N4  | C22 | -1.2(9)   | Ir3 | C57 | N10 | C69 | 14.6(8)   |
| C24 | C25 | N4  | Ir2 | 176.8(4)  | N1  | C1  | N2  | C3  | 3.1(6)    |
| C25 | C24 | Si1 | C26 | -123.6(7) | N1  | C1  | N2  | C13 | -172.7(5) |
| C25 | C24 | Si1 | C27 | 119.4(6)  | N1  | C2  | C3  | N2  | 0.2(7)    |
| C25 | C24 | Si1 | C28 | -1.9(6)   | N1  | C4  | C5  | C6  | -178.8(5) |
| C30 | C31 | N6  | C29 | -0.7(8)   | N1  | C4  | C5  | C10 | 2.7(9)    |
| C30 | C31 | N6  | C41 | 173.7(6)  | N1  | C4  | C9  | C8  | 178.1(5)  |
| C31 | C30 | N5  | C29 | 1.3(8)    | N1  | C4  | C9  | C12 | -0.7(9)   |
| C31 | C30 | N5  | C32 | -168.5(6) | N2  | C1  | N1  | C2  | -3.0(6)   |
| C32 | C33 | C34 | C35 | -1.7(9)   | N2  | C1  | N1  | C4  | 173.0(5)  |
| C33 | C32 | C37 | C36 | 2.7(9)    | N2  | C13 | C14 | C15 | 178.0(6)  |
| C33 | C32 | C37 | C40 | -179.5(6) | N2  | C13 | C14 | C19 | -2.4(9)   |
| C33 | C32 | N5  | C29 | -75.5(7)  | N2  | C13 | C18 | C17 | -176.0(6) |
| C33 | C32 | N5  | C30 | 92.8(7)   | N2  | C13 | C18 | C21 | 5.7(9)    |
| C33 | C34 | C35 | C36 | 3.9(10)   | N3  | C22 | N4  | C25 | 0.3(8)    |
| C33 | C34 | C35 | C39 | -175.8(6) | N3  | C22 | N4  | Ir2 | -177.8(4) |
| C34 | C35 | C36 | C37 | -2.8(10)  | N3  | C23 | C24 | C25 | 0.5(9)    |
| C35 | C36 | C37 | C32 | -0.4(10)  | N3  | C23 | C24 | Si1 | -177.5(5) |
| C35 | C36 | C37 | C40 | -178.2(6) | N4  | C22 | N3  | C23 | 1.0(8)    |
| C37 | C32 | C33 | C34 | -1.7(9)   | N4  | C22 | N3  | Ir1 | -163.7(4) |
| C37 | C32 | C33 | C38 | 179.7(5)  | N5  | C29 | N6  | C31 | 1.5(7)    |
| C37 | C32 | N5  | C29 | 104.7(7)  | N5  | C29 | N6  | C41 | -172.6(5) |
| C37 | C32 | N5  | C30 | -87.0(7)  | N5  | C30 | C31 | N6  | -0.3(8)   |
| C38 | C33 | C34 | C35 | 176.9(6)  | N5  | C32 | C33 | C34 | 178.6(5)  |
| C39 | C35 | C36 | C37 | 176.8(7)  | N5  | C32 | C33 | C38 | -0.1(8)   |
| C41 | C42 | C43 | C44 | 0.1(10)   | N5  | C32 | C37 | C36 | -177.5(5) |
| C42 | C41 | C46 | C45 | -1.8(10)  | N5  | C32 | C37 | C40 | 0.3(9)    |
| C42 | C41 | C46 | C49 | 177.4(6)  | N6  | C29 | N5  | C30 | -1.7(6)   |
| C42 | C41 | N6  | C29 | 86.9(8)   | N6  | C29 | N5  | C32 | 167.7(5)  |
| C42 | C41 | N6  | C31 | -86.7(8)  | N6  | C41 | C42 | C43 | 178.4(5)  |
| C42 | C43 | C44 | C45 | -2.2(10)  | N6  | C41 | C42 | C47 | -3.6(9)   |
| C42 | C43 | C44 | C48 | 176.8(7)  | N6  | C41 | C46 | C45 | -178.3(6) |
| C43 | C44 | C45 | C46 | 2.4(11)   | N6  | C41 | C46 | C49 | 0.9(9)    |
| C44 | C45 | C46 | C41 | -0.4(10)  | N7  | C50 | N8  | C53 | 0.1(8)    |
| C44 | C45 | C46 | C49 | -179.6(7) | N7  | C50 | N8  | Ir3 | 176.5(4)  |
| C46 | C41 | C42 | C43 | 2.0(9)    | N7  | C51 | C52 | C53 | -1.0(9)   |
| C46 | C41 | C42 | C47 | -180.0(6) | N7  | C51 | C52 | Si2 | -179.5(5) |
| C46 | C41 | N6  | C29 | -96.5(7)  | N8  | C50 | N7  | C51 | -0.1(8)   |
| C46 | C41 | N6  | C31 | 89.9(8)   | N8  | C50 | N7  | Ir2 | -165.7(4) |
| C47 | C42 | C43 | C44 | -178.0(6) | N9  | C57 | N10 | C59 | 1.4(6)    |
| C48 | C44 | C45 | C46 | -176.6(7) | N9  | C57 | N10 | C69 | -168.0(5) |
| C51 | C52 | C53 | N8  | 1.0(9)    | N9  | C58 | C59 | N10 | 0.4(7)    |
| C51 | C52 | Si2 | C54 | 56.9(6)   | N9  | C60 | C61 | C62 | -173.0(5) |
| C51 | C52 | Si2 | C55 | -60.9(6)  | N9  | C60 | C61 | C66 | 5.7(8)    |
| C51 | C52 | Si2 | C56 | 178.0(6)  | N9  | C60 | C65 | C64 | 172.9(5)  |
| C52 | C51 | N7  | C50 | 0.6(9)    | N9  | C60 | C65 | C68 | -5.9(8)   |
| C52 | C51 | N7  | Ir2 | 165.7(5)  | N10 | C57 | N9  | C58 | -1.1(6)   |
| C52 | C53 | N8  | C50 | -0.5(9)   | N10 | C57 | N9  | C60 | 175.9(5)  |
| C52 | C53 | N8  | Ir3 | -176.7(5) | N10 | C69 | C70 | C71 | 179.6(5)  |
| C53 | C52 | Si2 | C54 | -121.4(6) | N10 | C69 | C70 | C75 | -1.5(8)   |
| C53 | C52 | Si2 | C55 | 120.8(6)  | N10 | C69 | C74 | C73 | 179.6(5)  |
| C53 | C52 | Si2 | C56 | -0.4(7)   | N10 | C69 | C74 | C77 | -1.2(8)   |

|     |     |     |     |           |     |     |     |     |           |
|-----|-----|-----|-----|-----------|-----|-----|-----|-----|-----------|
| C58 | C59 | N10 | C57 | -1.2(7)   | N11 | C78 | N12 | C79 | -1.7(8)   |
| C58 | C59 | N10 | C69 | 168.8(5)  | N11 | C78 | N12 | Ir1 | -179.4(4) |
| C59 | C58 | N9  | C57 | 0.5(7)    | N12 | C78 | N11 | C81 | 2.3(8)    |
| C59 | C58 | N9  | C60 | -176.8(5) | N12 | C78 | N11 | Ir3 | -165.0(4) |
| C60 | C61 | C62 | C63 | 1.2(9)    | N12 | C79 | C80 | C81 | 0.4(8)    |
| C61 | C60 | C65 | C64 | -0.6(9)   | N12 | C79 | C80 | Si3 | 179.7(4)  |
| C61 | C60 | C65 | C68 | -179.4(6) | Si1 | C24 | C25 | N4  | 178.7(4)  |
| C61 | C60 | N9  | C57 | -87.0(7)  | Si2 | C52 | C53 | N8  | 179.4(5)  |
| C61 | C60 | N9  | C58 | 89.8(7)   | Si3 | C80 | C81 | N11 | -178.9(4) |
| C61 | C62 | C63 | C64 | -2.7(9)   |     |     |     |     |           |

Table S19. Hydrogen Atom Coordinates ( $\text{\AA}\times 10^4$ ) and Isotropic Displacement Parameters ( $\text{\AA}^2\times 10^3$ ) for  $\text{C}_{84}\text{H}_{114}\text{Cl}_3\text{Ir}_3\text{N}_{12}\text{Si}_3$ .

| Atom | x    | y    | z    | U(eq) |
|------|------|------|------|-------|
| H2   | 1395 | 6105 | 4129 | 37    |
| H3   | 2259 | 6253 | 3652 | 36    |
| H6   | -290 | 3591 | 4315 | 49    |
| H8   | 765  | 4177 | 5392 | 53    |
| H10A | 538  | 4691 | 3612 | 58    |
| H10B | 76   | 3872 | 3633 | 58    |
| H10C | 811  | 3717 | 3613 | 58    |
| H11A | -261 | 2875 | 5249 | 101   |
| H11B | -756 | 3522 | 5011 | 101   |
| H11C | -352 | 3843 | 5426 | 101   |
| H12A | 2171 | 4435 | 5041 | 75    |
| H12B | 1776 | 4940 | 5374 | 75    |
| H12C | 1919 | 5402 | 4939 | 75    |
| H15  | 3043 | 4076 | 2475 | 51    |
| H17  | 4384 | 4949 | 3347 | 56    |
| H19A | 1842 | 3796 | 3086 | 60    |
| H19B | 1968 | 4017 | 2607 | 60    |
| H19C | 1757 | 4775 | 2914 | 60    |
| H20A | 4643 | 4760 | 2602 | 118   |
| H20B | 4106 | 4470 | 2254 | 118   |
| H20C | 4442 | 3754 | 2560 | 118   |
| H21A | 3473 | 5745 | 4093 | 66    |
| H21B | 4155 | 5343 | 4052 | 66    |
| H21C | 3614 | 4750 | 4225 | 66    |
| H22  | 2480 | 2326 | 3172 | 28    |
| H23  | 3814 | 3035 | 4040 | 31    |
| H25  | 4237 | 1682 | 2991 | 29    |
| H26A | 4726 | 2161 | 4478 | 133   |
| H26B | 5461 | 1992 | 4464 | 133   |
| H26C | 4972 | 1259 | 4295 | 133   |
| H27A | 5299 | 3826 | 3536 | 97    |
| H27B | 5709 | 3597 | 3963 | 97    |
| H27C | 4996 | 3901 | 3980 | 97    |
| H28A | 5367 | 1144 | 3385 | 71    |
| H28B | 5953 | 1762 | 3512 | 71    |
| H28C | 5473 | 2017 | 3122 | 71    |
| H30  | 2267 | 1312 | 839  | 45    |
| H31  | 2037 | -205 | 1073 | 43    |
| H34  | 1873 | 4297 | 1696 | 41    |

|      |      |       |      |    |
|------|------|-------|------|----|
| H36  | 3623 | 4102  | 1273 | 45 |
| H38A | 1381 | 2189  | 1527 | 52 |
| H38B | 1239 | 3036  | 1800 | 52 |
| H38C | 1652 | 2256  | 2009 | 52 |
| H39A | 2449 | 5647  | 1458 | 85 |
| H39B | 3171 | 5563  | 1367 | 85 |
| H39C | 2968 | 5513  | 1841 | 85 |
| H40A | 3919 | 1987  | 1434 | 64 |
| H40B | 4060 | 2705  | 1086 | 64 |
| H40C | 3573 | 1934  | 970  | 64 |
| H43  | 1143 | -1464 | 2462 | 46 |
| H45  | 2862 | -2436 | 2244 | 49 |
| H47A | 1334 | 634   | 2194 | 61 |
| H47B | 792  | -83   | 2208 | 61 |
| H47C | 1045 | 196   | 1765 | 61 |
| H48A | 1810 | -2686 | 2971 | 85 |
| H48B | 2198 | -3296 | 2675 | 85 |
| H48C | 1464 | -3155 | 2569 | 85 |
| H49A | 3246 | -1095 | 1464 | 67 |
| H49B | 3591 | -1641 | 1843 | 67 |
| H49C | 3543 | -599  | 1875 | 67 |
| H50  | 2051 | 333   | 2938 | 26 |
| H51  | 3793 | -290  | 2730 | 30 |
| H53  | 2868 | -1617 | 3593 | 30 |
| H54A | 4839 | -483  | 3239 | 71 |
| H54B | 5239 | -1255 | 3467 | 71 |
| H54C | 4759 | -702  | 3725 | 71 |
| H55A | 4038 | -2747 | 2702 | 77 |
| H55B | 4769 | -2643 | 2831 | 77 |
| H55C | 4403 | -1896 | 2560 | 77 |
| H56A | 3917 | -2283 | 3960 | 79 |
| H56B | 4455 | -2888 | 3792 | 79 |
| H56C | 3745 | -3012 | 3609 | 79 |
| H58  | -755 | -1467 | 3934 | 33 |
| H59  | -357 | -688  | 4586 | 32 |
| H62  | -494 | -1116 | 2313 | 35 |
| H64  | -26  | -3513 | 2792 | 36 |
| H66A | -528 | 18    | 3243 | 44 |
| H66B | -466 | 175   | 2749 | 44 |
| H66C | 145  | 179   | 3070 | 44 |
| H67A | -868 | -2472 | 1925 | 77 |
| H67B | -646 | -3409 | 2103 | 77 |
| H67C | -167 | -2795 | 1877 | 77 |
| H68A | 706  | -2854 | 3756 | 61 |
| H68B | 437  | -3699 | 3507 | 61 |
| H68C | 5    | -3172 | 3810 | 61 |
| H71  | 1019 | 2192  | 4726 | 32 |
| H73  | 1794 | 194   | 5421 | 34 |
| H75A | -104 | 1116  | 4140 | 49 |
| H75B | 477  | 1094  | 3852 | 49 |
| H75C | 332  | 1960  | 4110 | 49 |
| H76A | 2137 | 2291  | 5226 | 63 |
| H76B | 2095 | 1654  | 5623 | 63 |

|      |      |       |      |    |
|------|------|-------|------|----|
| H76C | 1562 | 2370  | 5519 | 63 |
| H77A | 860  | -1434 | 5108 | 56 |
| H77B | 1591 | -1324 | 5239 | 56 |
| H77C | 1359 | -1535 | 4760 | 56 |
| H78  | 1712 | 1240  | 3843 | 22 |
| H79  | 3179 | 1691  | 4652 | 27 |
| H81  | 2541 | -768  | 4439 | 25 |
| H82A | 4195 | 1289  | 5083 | 68 |
| H82B | 4298 | 720   | 5505 | 68 |
| H82C | 3671 | 1278  | 5417 | 68 |
| H83A | 3942 | -1190 | 4556 | 83 |
| H83B | 4508 | -899  | 4883 | 83 |
| H83C | 4322 | -313  | 4475 | 83 |
| H84A | 2867 | -440  | 5512 | 73 |
| H84B | 3518 | -928  | 5625 | 73 |
| H84C | 3044 | -1292 | 5253 | 73 |
| H    | 1706 | 3020  | 4405 | 29 |
| HA   | 1813 | 2668  | 3679 | 29 |
| HB   | 2237 | 1614  | 2544 | 31 |
| HC   | 3031 | 2415  | 2222 | 31 |
| HD   | 1123 | -1290 | 3232 | 26 |
| HE   | 1284 | 213   | 3387 | 26 |

Table S20. Solvent masks information for  $s\text{-C}_{84}\text{H}_{114}\text{Cl}_3\text{Ir}_3\text{N}_{12}\text{Si}_3$ .

| Number | x      | y     | z     | Volume | Electron count | Content |
|--------|--------|-------|-------|--------|----------------|---------|
| 1      | 0.500  | 0.000 | 0.000 | 764.6  | 98.6           | ?       |
| 2      | -0.500 | 0.500 | 0.500 | 764.6  | 98.6           | ?       |
| 3      | 0.377  | 0.047 | 0.380 | 15.9   | 0.0            | ?       |
| 4      | 0.377  | 0.453 | 0.880 | 15.9   | 0.0            | ?       |
| 5      | 0.623  | 0.547 | 0.120 | 15.9   | 0.0            | ?       |
| 6      | 0.623  | 0.953 | 0.620 | 15.9   | 0.0            | ?       |

## 2.8 Complex characterisation by XRD – 3b

**2.8.1 Experimental:** Single crystals of  $C_{89.42}H_{141.68}Cl_3Ir_3N_{12}O_{5.42}Si_3$  were prepared in methanol- $d_4$ , under 3 bar  $H_2$ . A suitable crystal was selected, immersed in oil and placed on the micromount of a SuperNova, Dual, Cu at zero, Eos diffractometer. The crystal was kept at 110.05(10) K during data collection. Using Olex2 [16], the structure was solved with the ShelXS [17] structure solution program using Direct Methods and refined with the ShelXL [18] refinement package using Least Squares minimisation.

### 2.8.2 Crystal structure determination of $C_{89.42}H_{141.68}Cl_3Ir_3N_{12}O_{5.42}Si_3$ .

Crystal data for  $C_{89.41875}H_{141.67625}Cl_3Ir_3N_{12}O_{5.41875}Si_3$  ( $M = 2238.76$  g/mol): cubic, space group Pa-3 (no. 205),  $a = 27.98535(15)$  Å,  $V = 21917.6(3)$  Å<sup>3</sup>,  $Z = 8$ ,  $T = 110.05(10)$  K,  $\mu(\text{MoK}\alpha) = 3.788$  mm<sup>-1</sup>,  $D_{\text{calc}} = 1.357$  g/cm<sup>3</sup>, 61051 reflections measured ( $6.672^\circ \leq 2\theta \leq 64.236^\circ$ ), 12096 unique ( $R_{\text{int}} = 0.0379$ ,  $R_{\text{sigma}} = 0.0314$ ) which were used in all calculations. The final  $R_1$  was 0.0439 ( $I > 2\sigma(I)$ ) and  $wR_2$  was 0.1136 (all data).

### 2.8.3 Refinement model description:

Number of restraints - 6, number of constraints - unknown.

#### Details:

1. Fixed Uiso

At 1.2 times of: all C(H) groups, {H17A,H17B,H17C} of C17, All C(H,H) groups.

At 1.5 times of: all O(H) groups, {H30A,H30B,H30C} of C30, {H29A,H29B,H29C} of C29, {H28A, H28B,H28C} of C28, {H27A,H27B,H27C} of C27, {H26A,H26B,H26C} of C26, {H31A, H31B,H31C} of C31, {H5A,H5B,H5C} of C5, {H6A,H6B,H6C} of C6, {H7A,H7B,H7C} of C7, {H18A,H18B,H18C} of C18, {H19A,H19B,H19C} of C19

2. Uiso/Uanis restraints and constraints: Uanis(N2)  $\approx$  Ueq: with sigma of 0.001 and sigma for terminal atoms of 0.002

3. Others:

Sof(C31)=Sof(H31A)=Sof(H31B)=Sof(H31C)=Sof(O3)=Sof(H3A)=FVAR(1).

Sof(C30)=Sof(H30A)=Sof(H30B)=Sof(H30C)=Sof(O2)=Sof(H2)=FVAR(2).

Fixed Sof: H29A(0.33333) H29B(0.33333) H29C(0.33333) H1A(0.33333).

4.a Secondary CH2 refined with riding coordinates: C9(H9A,H9B), C10(H10A,H10B)

4.b Aromatic/amide H refined with riding coordinates: C1(H1), C3(H3), C4(H4), C13(H13), C15(H15), C22(H22), C24(H24)

4.c Idealised Me refined as rotating group:

C5(H5A,H5B,H5C), C6(H6A,H6B,H6C), C7(H7A,H7B,H7C), C17(H17A,H17B,H17C),

C18(H18A,H18B,H18C), C19(H19A,H19B,H19C), C26(H26A,H26B,H26C), C27(H27A,H27B, H27C),

C28(H28A,H28B,H28C), C29(H29A,H29B,H29C), C30(H30A,H30B,H30C), C31(H31A, H31B,H31C)

4.d Idealised tetrahedral OH refined with riding coordinates: O3(H3A).

4.e Idealised tetrahedral OH refined as rotating group: O1(H1A), O2(H2).

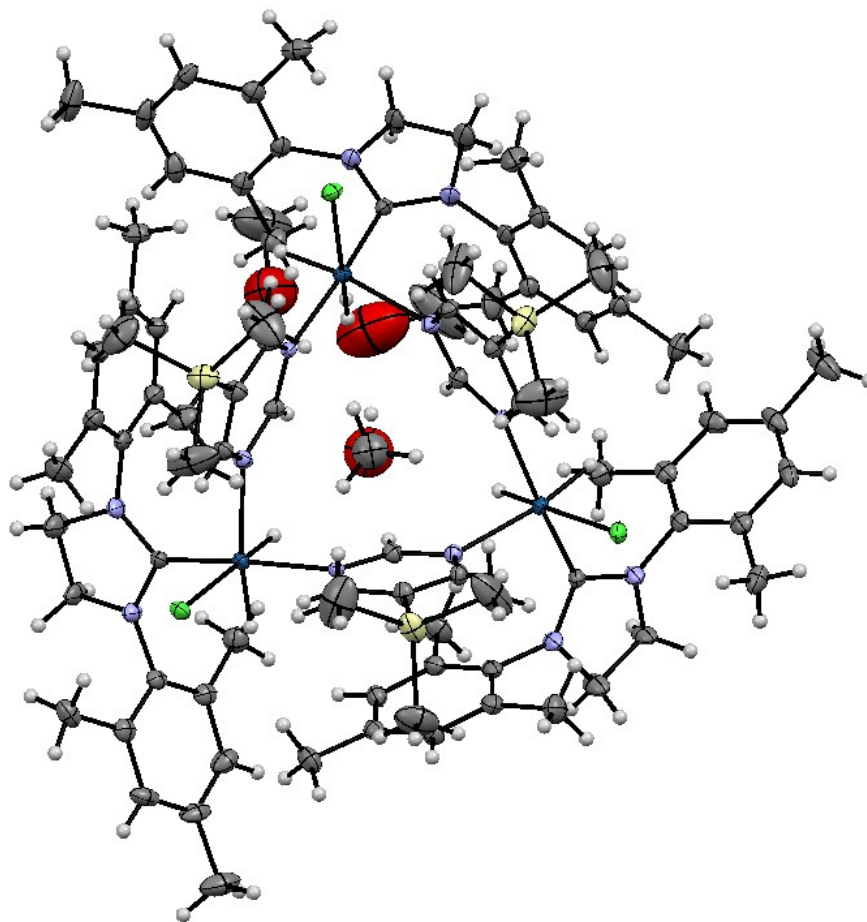

Figure S14. XRD structure of  $C_{89.41875}H_{141.67625}Cl_3Ir_3N_{12}O_5$ .

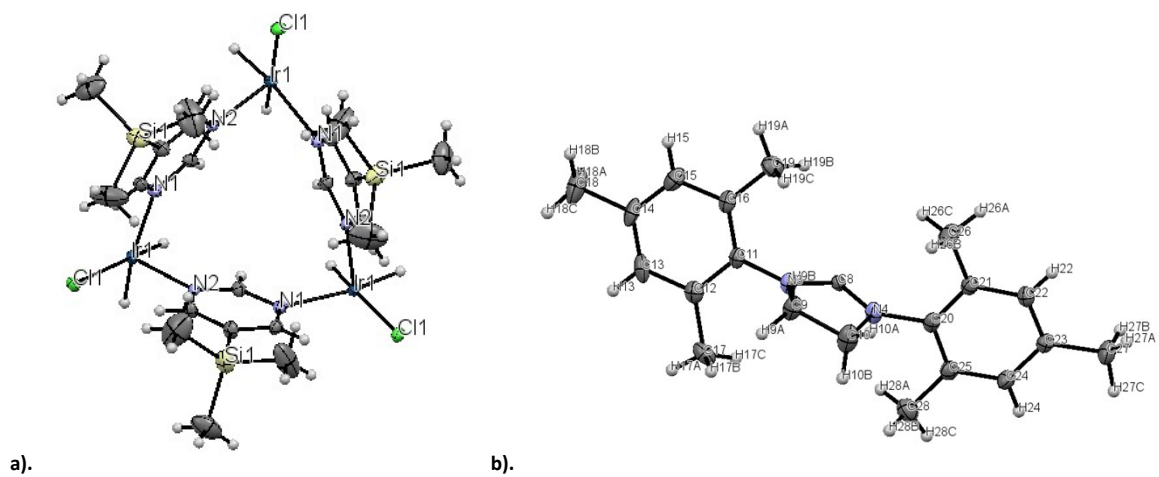

Figure S15. Selected aspects of the XRD structure of  $C_{89.41875}H_{141.67625}Cl_3Ir_3N_{12}O_5$ : a). Representation of central trimer without the three carbene units attached to the Ir atoms; b). Representation of the carbene unit with the corresponding atom labels.

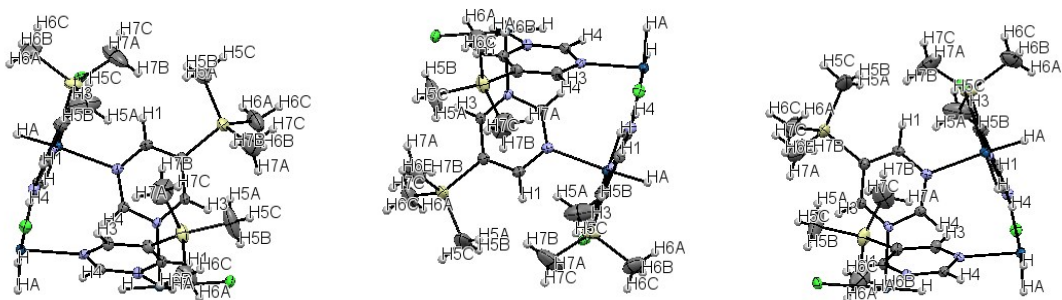

Figure S16. Selected aspects of the XRD structure of  $C_{89.41875}H_{141.67625}Cl_3Ir_3N_{12}O_5$ : Representation of central trimer without the three carbene units attached to the Ir atoms and the corresponding labels for the H atoms. For clarity the trimer is presented from three different perspectives.

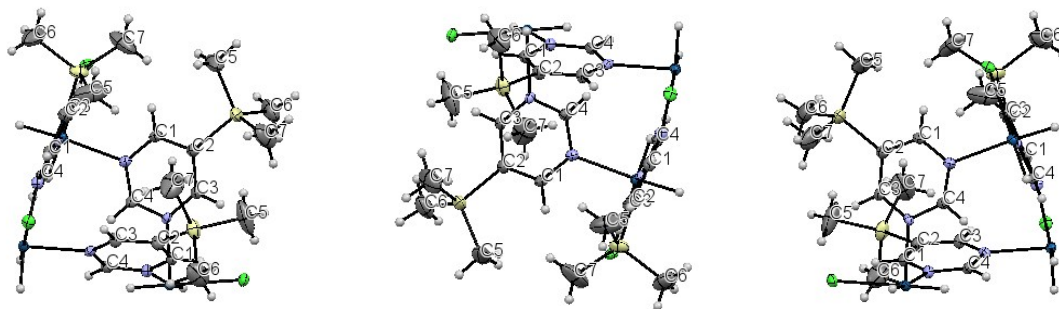

Figure S17. Selected aspects of the XRD structure of  $C_{89.41875}H_{141.67625}Cl_3Ir_3N_{12}O_5$ : Representation of central trimer without the three carbene units attached to the Ir atoms and the corresponding labels for the C atoms. For clarity the trimer is presented from three different perspectives.

**Table S21. Fractional Atomic Coordinates ( $\times 10^4$ ) and Equivalent Isotropic Displacement Parameters ( $\text{\AA}^2 \times 10^3$ ) for  $\text{C}_{89.41875}\text{H}_{141.67625}\text{Cl}_3\text{Ir}_3\text{N}_{12}\text{O}_5$ .  $U_{\text{eq}}$  is defined as 1/3 of the trace of the orthogonalised  $U_{ij}$  tensor.**

| Atom | x          | y          | z          | U(eq)    |
|------|------------|------------|------------|----------|
| C1   | 3173.8(18) | 6639.2(18) | 3063.6(17) | 18.0(9)  |
| C2   | 3605.4(18) | 6803.1(18) | 2878.6(19) | 20.6(10) |
| C3   | 3644.2(17) | 7298.0(17) | 2843.5(18) | 18.1(9)  |
| C4   | 2894.4(17) | 7400.1(17) | 3158.1(17) | 16.5(8)  |
| C5   | 3859(3)    | 5787(3)    | 2582(4)    | 68(3)    |
| C6   | 4513(3)    | 6342(3)    | 3247(3)    | 54(2)    |
| C7   | 4444(3)    | 6635(4)    | 2207(4)    | 71(3)    |
| C8   | 2066.2(17) | 6633.3(16) | 4065.0(16) | 15.1(8)  |
| C9   | 1769(2)    | 6534(2)    | 4857.3(18) | 26.1(12) |
| C10  | 2293(2)    | 6672(3)    | 4882.4(19) | 33.1(14) |
| C11  | 1262.4(18) | 6242.4(19) | 4197.0(17) | 18.7(9)  |
| C12  | 1214(2)    | 5746(2)    | 4220.0(18) | 22.5(10) |
| C13  | 770(2)     | 5543(2)    | 4115.6(19) | 27.3(12) |
| C14  | 383(2)     | 5821(2)    | 3989(2)    | 28.0(12) |
| C15  | 434(2)     | 6319(2)    | 3990(2)    | 27.8(12) |
| C16  | 870.0(19)  | 6535.7(19) | 4098.3(18) | 20.8(10) |
| C17  | 1633(2)    | 5438(2)    | 4366(2)    | 28.3(12) |
| C18  | -83(2)     | 5592(3)    | 3838(3)    | 44.7(18) |
| C19  | 919(2)     | 7071(2)    | 4106(2)    | 28.3(11) |
| C20  | 2834.5(18) | 7033(2)    | 4284.1(17) | 20.1(10) |
| C21  | 2827.9(18) | 7533(2)    | 4293.0(18) | 21.1(10) |
| C22  | 3254.5(18) | 7774.6(19) | 4228.8(18) | 20.8(10) |
| C23  | 3683.4(18) | 7529.5(19) | 4155.3(18) | 19.6(9)  |
| C24  | 3677.4(19) | 7031(2)    | 4160(2)    | 23.2(10) |
| C25  | 3257.9(19) | 6776(2)    | 4226.3(19) | 22.4(10) |
| C26  | 2365(2)    | 7802(2)    | 4379(3)    | 34.3(14) |
| C27  | 4139(2)    | 7800(2)    | 4057(2)    | 28.3(12) |
| C28  | 3257(2)    | 6237(2)    | 4232(2)    | 34.6(14) |
| C29  | 1608(3)    | 8392(3)    | 3392(3)    | 54(3)    |
| C30  | 1321(7)    | 8443(7)    | 4933(5)    | 109(8)   |
| Cl1  | 2367.3(4)  | 5804.8(4)  | 3306.1(4)  | 18.9(2)  |
| Ir1  | 2082.8(2)  | 6659.0(2)  | 3364.7(2)  | 13.66(5) |
| N1   | 2818.9(15) | 6932.1(14) | 3203.3(15) | 16.3(8)  |
| N2   | 3301.0(13) | 7590.0(14) | 2974.5(13) | 13.1(7)  |
| N3   | 1704.5(15) | 6449.0(16) | 4342.0(14) | 19.5(8)  |
| N4   | 2399.4(16) | 6784.9(17) | 4383.4(15) | 22.7(9)  |
| O1   | 1325(3)    | 8675(3)    | 3675(3)    | 91(4)    |
| O2   | 1046(9)    | 8284(7)    | 4536(7)    | 179(9)   |
| Si1  | 4111.7(6)  | 6386.4(6)  | 2720.1(7)  | 30.0(4)  |
| C31  | 20(8)      | 7796(7)    | 5028(7)    | 109(8)   |
| O3   | 105(6)     | 8172(7)    | 4731(6)    | 156(8)   |



**Table S22. Anisotropic Displacement Parameters ( $\text{\AA}^2 \times 10^3$ ) for  $\text{C}_{89.41875}\text{H}_{141.67625}\text{Cl}_3\text{Ir}_3\text{N}_{12}\text{O}_5$ . The anisotropic displacement factor exponent takes the form:  $-2\pi^2[h^2a^*U_{11}+2hka^*b^*U_{12}+\dots]$ .**

| Atom | $U_{11}$ | $U_{22}$ | $U_{33}$ | $U_{23}$ | $U_{13}$ | $U_{12}$ |
|------|----------|----------|----------|----------|----------|----------|
| C1   | 21(2)    | 14(2)    | 18(2)    | 1.0(17)  | -0.5(18) | -1.6(18) |
| C2   | 19(2)    | 19(2)    | 24(2)    | -0.7(19) | 3.2(19)  | 0.1(18)  |
| C3   | 13(2)    | 17(2)    | 24(2)    | -1.2(18) | 1.7(18)  | 0.9(17)  |
| C4   | 17(2)    | 17(2)    | 16(2)    | -2.5(17) | 0.7(17)  | -0.8(17) |
| C5   | 39(4)    | 37(4)    | 129(9)   | -35(5)   | -15(5)   | 8(3)     |
| C6   | 38(4)    | 59(5)    | 66(5)    | -16(4)   | -15(4)   | 19(4)    |
| C7   | 60(5)    | 68(6)    | 87(7)    | 16(5)    | 44(5)    | 24(5)    |
| C8   | 17(2)    | 13.5(19) | 14.8(19) | 1.3(16)  | -0.8(16) | -3.2(17) |
| C9   | 25(3)    | 43(3)    | 11(2)    | 1(2)     | -2.1(18) | -11(2)   |
| C10  | 33(3)    | 52(4)    | 15(2)    | 0(2)     | -1(2)    | -16(3)   |
| C11  | 19(2)    | 24(2)    | 13(2)    | 0.3(18)  | 3.1(17)  | -5.2(19) |
| C12  | 25(2)    | 27(3)    | 15(2)    | -1.4(19) | 4.2(19)  | -3(2)    |
| C13  | 34(3)    | 27(3)    | 21(2)    | -6(2)    | 10(2)    | -16(2)   |
| C14  | 19(2)    | 44(3)    | 21(2)    | -9(2)    | 8(2)     | -13(2)   |
| C15  | 19(2)    | 42(3)    | 23(3)    | -5(2)    | 1(2)     | -2(2)    |
| C16  | 20(2)    | 27(3)    | 15(2)    | -3.9(18) | 4.5(18)  | -4.1(19) |
| C17  | 41(3)    | 20(2)    | 23(2)    | 3(2)     | 6(2)     | 0(2)     |
| C18  | 30(3)    | 64(5)    | 40(4)    | -22(3)   | 9(3)     | -21(3)   |
| C19  | 33(3)    | 23(3)    | 29(3)    | -2(2)    | -1(2)    | 1(2)     |
| C20  | 20(2)    | 28(3)    | 12(2)    | 1.9(18)  | -2.8(17) | -7(2)    |
| C21  | 18(2)    | 26(3)    | 19(2)    | 0.8(19)  | -1.6(18) | -2.1(19) |
| C22  | 22(2)    | 21(2)    | 19(2)    | -1.1(18) | 0.7(19)  | -4.5(19) |
| C23  | 19(2)    | 24(2)    | 16(2)    | -0.6(18) | -0.1(18) | -3.2(19) |
| C24  | 17(2)    | 26(3)    | 26(3)    | 0(2)     | 0.4(19)  | 0.4(19)  |
| C25  | 23(2)    | 25(2)    | 20(2)    | 0.0(19)  | -3.6(19) | -4(2)    |
| C26  | 20(3)    | 39(3)    | 44(4)    | -5(3)    | -1(2)    | 3(2)     |
| C27  | 21(2)    | 30(3)    | 33(3)    | -3(2)    | 3(2)     | -7(2)    |
| C28  | 40(3)    | 24(3)    | 41(3)    | 2(3)     | -5(3)    | -4(2)    |
| C29  | 54(3)    | 54(3)    | 54(3)    | -2(4)    | 2(4)     | 2(4)     |
| C30  | 132(16)  | 155(19)  | 39(7)    | -17(9)   | -17(8)   | 78(14)   |
| Cl1  | 23.2(5)  | 14.1(5)  | 19.4(5)  | 2.8(4)   | -0.5(4)  | -3.9(4)  |
| Ir1  | 14.43(8) | 13.82(8) | 12.73(8) | 1.78(6)  | 0.39(6)  | -1.71(6) |
| N1   | 17.3(19) | 13.5(17) | 18.2(18) | 0.2(15)  | 0.0(15)  | -1.0(14) |
| N2   | 11.3(10) | 15.4(10) | 12.5(10) | 2.8(8)   | -2.0(8)  | -2.7(8)  |
| N3   | 20(2)    | 26(2)    | 12.3(17) | 0.1(16)  | 0.3(15)  | -6.6(17) |
| N4   | 24(2)    | 32(2)    | 12.2(18) | 5.1(17)  | -0.6(16) | -9.6(18) |
| O1   | 91(4)    | 91(4)    | 91(4)    | -12(5)   | 12(5)    | 12(5)    |
| O2   | 220(20)  | 144(17)  | 171(18)  | 19(13)   | 52(16)   | -28(14)  |
| Si1  | 20.9(7)  | 24.5(8)  | 44.6(10) | -5.5(7)  | 5.1(7)   | 3.7(6)   |
| C31  | 121(17)  | 117(16)  | 88(13)   | 50(12)   | 22(11)   | 20(13)   |
| O3   | 123(14)  | 173(17)  | 172(17)  | 68(14)   | -25(12)  | -29(12)  |

**Table S23. Bond lengths for  $C_{89.41875}H_{141.67625}Cl_3Ir_3N_{12}O_5$ .**

| Atom | Atom | Length/Å | Atom | Atom             | Length/Å   |
|------|------|----------|------|------------------|------------|
| C1   | C2   | 1.392(7) | C14  | C15              | 1.403(9)   |
| C1   | N1   | 1.346(6) | C14  | C18              | 1.513(8)   |
| C2   | C3   | 1.393(7) | C15  | C16              | 1.396(7)   |
| C2   | Si1  | 1.888(5) | C16  | C19              | 1.505(8)   |
| C3   | N2   | 1.313(6) | C20  | C21              | 1.397(8)   |
| C4   | N1   | 1.333(6) | C20  | C25              | 1.397(8)   |
| C4   | N2   | 1.357(6) | C20  | N4               | 1.430(6)   |
| C5   | Si1  | 1.862(8) | C21  | C22              | 1.384(7)   |
| C6   | Si1  | 1.858(8) | C21  | C26              | 1.517(8)   |
| C7   | Si1  | 1.846(9) | C22  | C23              | 1.398(7)   |
| C8   | Ir1  | 1.962(5) | C23  | C24              | 1.396(7)   |
| C8   | N3   | 1.375(6) | C23  | C27              | 1.507(7)   |
| C8   | N4   | 1.358(6) | C24  | C25              | 1.387(7)   |
| C9   | C10  | 1.517(8) | C25  | C28              | 1.507(8)   |
| C9   | N3   | 1.473(6) | C29  | O1               | 1.37(2)    |
| C10  | N4   | 1.463(7) | C30  | O2               | 1.42(2)    |
| C11  | C12  | 1.398(7) | Cl1  | Ir1              | 2.5250(12) |
| C11  | C16  | 1.399(7) | Ir1  | N1               | 2.243(4)   |
| C11  | N3   | 1.425(6) | Ir1  | N2 <sup>1</sup>  | 2.177(4)   |
| C12  | C13  | 1.399(8) | N2   | Ir1 <sup>2</sup> | 2.177(4)   |
| C12  | C17  | 1.511(8) | C31  | O3               | 1.36(2)    |
| C13  | C14  | 1.379(9) |      |                  |            |

Table S24. Torsion angles for  $C_{89.41875}H_{141.67625}Cl_3Ir_3N_{12}O_5$ .

| A   | B   | C   | D                | Angle/°   | A   | B   | C   | D                | Angle/°   |
|-----|-----|-----|------------------|-----------|-----|-----|-----|------------------|-----------|
| C1  | C2  | C3  | N2               | 0.0(8)    | C21 | C22 | C23 | C24              | -1.7(8)   |
| C1  | C2  | Si1 | C5               | 25.7(6)   | C21 | C22 | C23 | C27              | 176.4(5)  |
| C1  | C2  | Si1 | C6               | -93.0(6)  | C22 | C23 | C24 | C25              | 1.3(8)    |
| C1  | C2  | Si1 | C7               | 147.8(6)  | C23 | C24 | C25 | C20              | 0.6(8)    |
| C2  | C1  | N1  | C4               | 0.0(7)    | C23 | C24 | C25 | C28              | -179.9(5) |
| C2  | C1  | N1  | Ir1              | 168.0(4)  | C25 | C20 | C21 | C22              | 1.8(8)    |
| C2  | C3  | N2  | C4               | 1.0(7)    | C25 | C20 | C21 | C26              | -177.2(5) |
| C2  | C3  | N2  | Ir1 <sup>1</sup> | -179.1(4) | C25 | C20 | N4  | C8               | -93.7(7)  |
| C3  | C2  | Si1 | C5               | -157.8(6) | C25 | C20 | N4  | C10              | 85.8(7)   |
| C3  | C2  | Si1 | C6               | 83.5(6)   | C26 | C21 | C22 | C23              | 179.2(5)  |
| C3  | C2  | Si1 | C7               | -35.7(7)  | C27 | C23 | C24 | C25              | -176.7(5) |
| C9  | C10 | N4  | C8               | -14.4(7)  | Ir1 | C8  | N3  | C9               | -172.9(4) |
| C9  | C10 | N4  | C20              | 166.1(5)  | Ir1 | C8  | N3  | C11              | -0.8(8)   |
| C10 | C9  | N3  | C8               | -15.9(6)  | Ir1 | C8  | N4  | C10              | -174.7(4) |
| C10 | C9  | N3  | C11              | 171.0(5)  | Ir1 | C8  | N4  | C20              | 4.8(8)    |
| C11 | C12 | C13 | C14              | 0.4(8)    | N1  | C1  | C2  | C3               | -0.5(8)   |
| C12 | C11 | C16 | C15              | -4.3(7)   | N1  | C1  | C2  | Si1              | 176.2(4)  |
| C12 | C11 | C16 | C19              | 175.9(5)  | N1  | C4  | N2  | C3               | -1.6(7)   |
| C12 | C11 | N3  | C8               | 104.5(6)  | N1  | C4  | N2  | Ir1 <sup>1</sup> | 178.5(4)  |
| C12 | C11 | N3  | C9               | -83.7(6)  | N2  | C4  | N1  | C1               | 1.1(7)    |
| C12 | C13 | C14 | C15              | -3.3(8)   | N2  | C4  | N1  | Ir1              | -167.1(3) |
| C12 | C13 | C14 | C18              | 174.9(5)  | N3  | C8  | N4  | C10              | 4.9(6)    |
| C13 | C14 | C15 | C16              | 2.5(8)    | N3  | C8  | N4  | C20              | -175.6(5) |
| C14 | C15 | C16 | C11              | 1.3(8)    | N3  | C9  | C10 | N4               | 16.6(6)   |
| C14 | C15 | C16 | C19              | -179.0(5) | N3  | C11 | C12 | C13              | 174.9(4)  |
| C16 | C11 | C12 | C13              | 3.6(7)    | N3  | C11 | C12 | C17              | -3.8(7)   |
| C16 | C11 | C12 | C17              | -175.1(5) | N3  | C11 | C16 | C15              | -175.5(4) |
| C16 | C11 | N3  | C8               | -84.1(7)  | N3  | C11 | C16 | C19              | 4.8(7)    |
| C16 | C11 | N3  | C9               | 87.7(6)   | N4  | C8  | N3  | C9               | 7.5(6)    |
| C17 | C12 | C13 | C14              | 179.0(5)  | N4  | C8  | N3  | C11              | 179.6(5)  |
| C18 | C14 | C15 | C16              | -175.7(5) | N4  | C20 | C21 | C22              | 175.7(4)  |
| C20 | C21 | C22 | C23              | 0.2(8)    | N4  | C20 | C21 | C26              | -3.2(7)   |
| C21 | C20 | C25 | C24              | -2.2(8)   | N4  | C20 | C25 | C24              | -176.0(5) |
| C21 | C20 | C25 | C28              | 178.2(5)  | N4  | C20 | C25 | C28              | 4.4(8)    |
| C21 | C20 | N4  | C8               | 92.3(7)   | Si1 | C2  | C3  | N2               | -176.7(4) |
| C21 | C20 | N4  | C10              | -88.3(6)  |     |     |     |                  |           |

Table S25. Atomic occupancy for  $C_{89.41875}H_{141.67625}Cl_3Ir_3N_{12}O_5$ .

| Atom | Occupancy | Atom | Occupancy | Atom | Occupancy |
|------|-----------|------|-----------|------|-----------|
| H29A | 0.3333    | H29B | 0.3333    | H29C | 0.3333    |
| C30  | 0.75(2)   | H30A | 0.75(2)   | H30B | 0.75(2)   |
| H30C | 0.75(2)   | H1A  | 0.3333    | O2   | 0.75(2)   |
| H2   | 0.75(2)   | C31  | 0.722(19) | H31A | 0.722(19) |
| H31B | 0.722(19) | H31C | 0.722(19) | O3   | 0.722(19) |
| H3A  | 0.722(19) |      |           |      |           |

Table S26. Hydrogen Atom Coordinates ( $\text{\AA}\times 10^4$ ) and Isotropic Displacement Parameters ( $\text{\AA}^2\times 10^3$ ) for  $\text{C}_{89.41875}\text{H}_{141.67625}\text{Cl}_3\text{Ir}_3\text{N}_{12}\text{O}_5$ .

| Atom | x        | y        | z        | U(eq)  |
|------|----------|----------|----------|--------|
| H1   | 3128     | 6311     | 3092     | 22     |
| H3   | 3925     | 7427     | 2722     | 22     |
| H4   | 2655     | 7608     | 3258     | 20     |
| H5A  | 3664     | 5807     | 2300     | 103    |
| H5B  | 3667     | 5680     | 2846     | 103    |
| H5C  | 4114     | 5564     | 2529     | 103    |
| H6A  | 4351     | 6179     | 3501     | 82     |
| H6B  | 4600     | 6657     | 3351     | 82     |
| H6C  | 4796     | 6168     | 3161     | 82     |
| H7A  | 4542     | 6956     | 2279     | 107    |
| H7B  | 4243     | 6636     | 1930     | 107    |
| H7C  | 4721     | 6442     | 2146     | 107    |
| H9A  | 1704     | 6248     | 5042     | 31     |
| H9B  | 1565     | 6791     | 4969     | 31     |
| H10A | 2341     | 6948     | 5087     | 40     |
| H10B | 2487     | 6409     | 4997     | 40     |
| H13  | 734      | 5213     | 4132     | 33     |
| H15  | 171      | 6510     | 3918     | 33     |
| H17A | 1548     | 5107     | 4333     | 34     |
| H17B | 1715     | 5503     | 4692     | 34     |
| H17C | 1901     | 5507     | 4164     | 34     |
| H18A | -71      | 5518     | 3503     | 67     |
| H18B | -342     | 5809     | 3898     | 67     |
| H18C | -133     | 5304     | 4017     | 67     |
| H19A | 618      | 7215     | 4027     | 42     |
| H19B | 1155     | 7168     | 3877     | 42     |
| H19C | 1015     | 7172     | 4420     | 42     |
| H22  | 3256     | 8107     | 4235     | 25     |
| H24  | 3963     | 6865     | 4118     | 28     |
| H26A | 2415     | 8136     | 4322     | 51     |
| H26B | 2264     | 7755     | 4704     | 51     |
| H26C | 2123     | 7684     | 4166     | 51     |
| H27A | 4146     | 8085     | 4249     | 42     |
| H27B | 4152     | 7886     | 3725     | 42     |
| H27C | 4408     | 7603     | 4135     | 42     |
| H28A | 3008     | 6121     | 4027     | 52     |
| H28B | 3203     | 6126     | 4552     | 52     |
| H28C | 3560     | 6121     | 4120     | 52     |
| H29A | 1938     | 8469     | 3447     | 81     |
| H29B | 1531     | 8447     | 3062     | 81     |
| H29C | 1553     | 8062     | 3469     | 81     |
| H30A | 1377     | 8181     | 5146     | 163    |
| H30B | 1149     | 8690     | 5099     | 163    |
| H30C | 1621     | 8567     | 4823     | 163    |
| H    | 1920(20) | 7120(20) | 3400(20) | 12(13) |
| HA   | 1590(30) | 6510(30) | 3400(30) | 36(19) |
| H1A  | 1263     | 8534     | 3925     | 137    |
| H2   | 843      | 8093     | 4627     | 268    |
| H31A | 166      | 7513     | 4899     | 163    |
| H31B | -318     | 7747     | 5057     | 163    |
| H31C | 153      | 7862     | 5337     | 163    |
| H3A  | -72      | 8394     | 4803     | 234    |

## 2.9 Complex characterisation by NMR

The NMR data for species **2** and **3** is detailed below. These reflect the dominant forms of the SABRE catalyst.

**Table S27: NMR characterisation data for 2a in methanol- $d_4$  at 245 K**

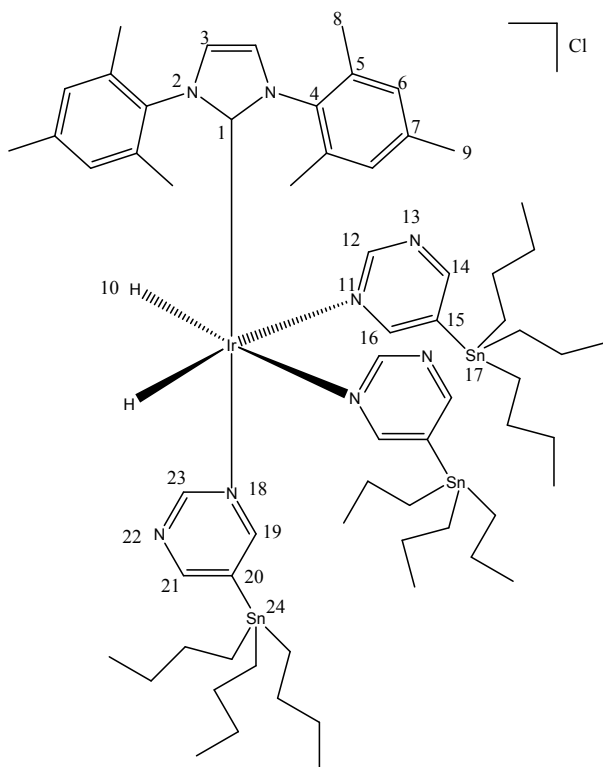

| Resonance number | $^1\text{H}$ (ppm) | $^{13}\text{C}$ (ppm) | $^{15}\text{N}$ (ppm) or $^{119}\text{Sn}$ (ppm) |
|------------------|--------------------|-----------------------|--------------------------------------------------|
| 1                |                    | 150.5                 |                                                  |
| 2                |                    |                       | 194.6                                            |
| 3                | 7.33               | 123.0                 |                                                  |
| 4                |                    | 137.3                 |                                                  |
| 5                |                    | 135.0                 |                                                  |
| 6                | 6.73               | 128.5                 |                                                  |
| 7                |                    | 137                   |                                                  |
| 8                | 2.08               | 17.64                 |                                                  |
| 9                | 2.21               | 20.10                 |                                                  |
| 10               | -22.06             |                       |                                                  |
| 11               |                    |                       | 241.4                                            |
| 12               | 9.03               | 162.02                |                                                  |
| 13               |                    |                       | 295.4                                            |
| 14               | 8.85               | 162.76                |                                                  |
| 15               |                    | 136.6                 |                                                  |
| 16               | 8.30               | 165.47                |                                                  |
| 17               |                    |                       | -50.14                                           |
| 18               |                    |                       | 228                                              |
| 19               | 8.44               | 168.51                |                                                  |
| 20               |                    | 136.6                 |                                                  |
| 21               | 8.75               | 163.0                 |                                                  |
| 22               |                    |                       | 297.9                                            |
| 23               | 8.37               | 161.92                |                                                  |
| 24               |                    |                       | -50.60                                           |

Table S28 NMR characterisation data for 2b in methanol-*d*<sub>4</sub> at 245 K

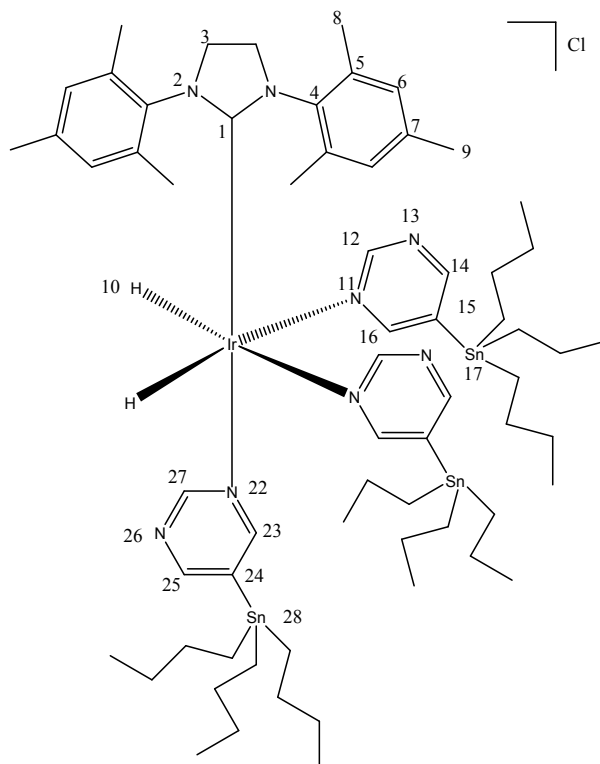

| Resonance number | <sup>1</sup> H (ppm) | <sup>13</sup> C (ppm) | <sup>15</sup> N (ppm) or <sup>119</sup> Sn (ppm) |
|------------------|----------------------|-----------------------|--------------------------------------------------|
| 1                |                      | 163.44                |                                                  |
| 2                |                      |                       | 194.65                                           |
| 3                | 3.96                 |                       |                                                  |
| 4                |                      |                       |                                                  |
| 5                |                      | 135.89                |                                                  |
| 6                | 6.63                 | 168.76                |                                                  |
| 7                |                      | 137.51                |                                                  |
| 8                | 2.27                 | 17.58                 |                                                  |
| 9                | 2.16                 | 20.03                 |                                                  |
| 10               | -22.15               |                       |                                                  |
| 11               |                      |                       | 240.56                                           |
| 12               | 9.06                 | 162.16                |                                                  |
| 13               |                      |                       | 294.70                                           |
| 14               | 8.85                 | 157.09                |                                                  |
| 15               |                      |                       |                                                  |
| 16               | 8.23                 | 165.28                |                                                  |
| 17               |                      |                       | -49.92                                           |
| 18               |                      |                       | 226.70                                           |
| 19               | 8.35                 | 167.99                |                                                  |
| 20               |                      |                       |                                                  |
| 21               | 8.73                 | 163.14                |                                                  |
| 22               |                      |                       | 295.15                                           |
| 23               | 8.26                 | 161.4                 |                                                  |
| 28               |                      |                       | -50.44                                           |

Table S29 NMR characterisation data for 3a in methanol- $d_4$  at 245 K

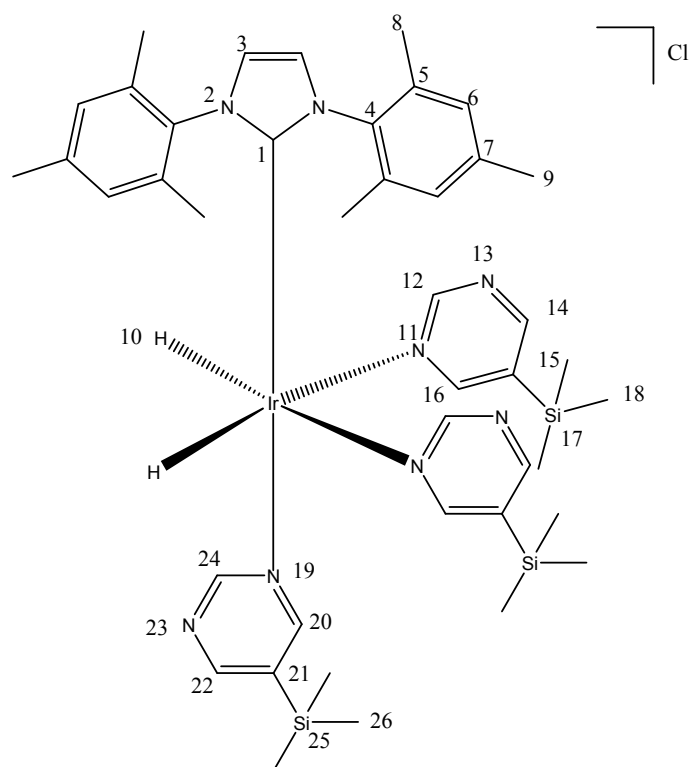

| Resonance number | $^1\text{H}$ (ppm) | $^{13}\text{C}$ (ppm) | $^{15}\text{N}$ (ppm) or $^{29}\text{Si}$ (ppm) |
|------------------|--------------------|-----------------------|-------------------------------------------------|
| 1                |                    | 150.6                 |                                                 |
| 2                |                    |                       | 194.8                                           |
| 3                | 7.34               | 123.0                 |                                                 |
| 4                |                    | 137.1                 |                                                 |
| 5                |                    | 135.1                 |                                                 |
| 6                | 6.75               | 128.6                 |                                                 |
| 7                |                    | 138.5                 |                                                 |
| 8                | 2.08               | 17.55                 |                                                 |
| 9                | 2.21               | 19.97                 |                                                 |
| 10               | -22.09             |                       |                                                 |
| 11               |                    |                       | 240.6                                           |
| 12               | 9.12 s             | 162.73                |                                                 |
| 13               |                    |                       | 294.7                                           |
| 14               | 8.95               | 163.67                |                                                 |
| 15               |                    | 134.1                 |                                                 |
| 16               | 8.44 d 2.0 Hz      | 163.66                |                                                 |
| 17               |                    |                       | -3.46                                           |
| 18               | 0.26               | -3.2                  |                                                 |
| 19               |                    |                       | 226.9                                           |
| 20               | 8.82               | 160.81                |                                                 |
| 21               |                    | 134.3                 |                                                 |
| 22               | 7.86 d             | 164.24                |                                                 |
| 23               |                    |                       | 295.1                                           |
| 24               | 8.99               | 164.2                 |                                                 |
| 25               |                    |                       | -3.67                                           |
| 26               | 0.08               | -3.2                  |                                                 |

Table S30 NMR characterisation data for 3b in methanol-*d*<sub>4</sub> at 245 K

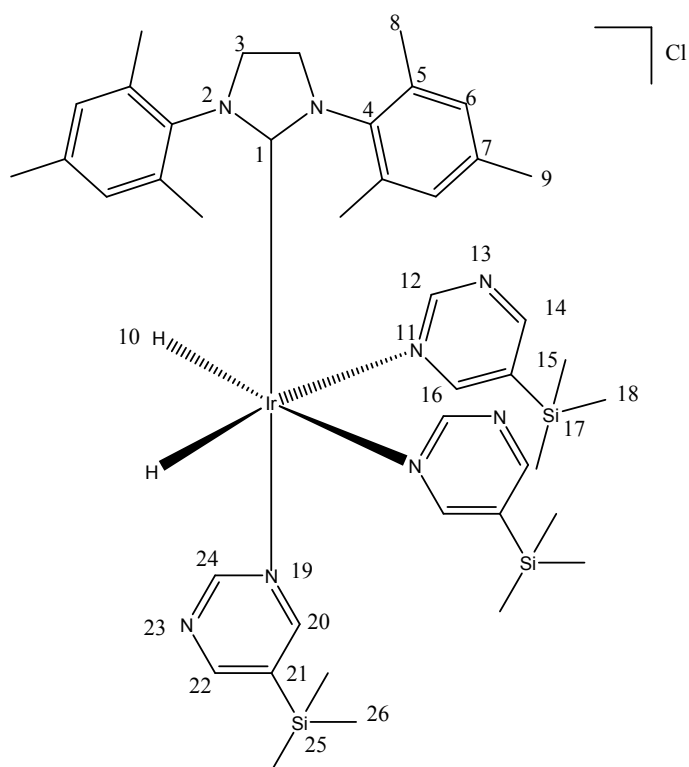

| Resonance number | <sup>1</sup> H (ppm) | <sup>13</sup> C (ppm) | <sup>15</sup> N (ppm) or <sup>29</sup> Si (ppm) |
|------------------|----------------------|-----------------------|-------------------------------------------------|
| 1                |                      | 170.7                 |                                                 |
| 2                |                      |                       | -                                               |
| 3                | 3.97                 | 78.5                  |                                                 |
| 4                |                      | 137.5                 |                                                 |
| 5                |                      | 135.8                 |                                                 |
| 6                | 6.66                 | 128.7                 |                                                 |
| 7                |                      | 137.8                 |                                                 |
| 8                | 2.28                 | 17.57                 |                                                 |
| 9                | 2.15                 | 19.89                 |                                                 |
| 10               | -22.09               |                       |                                                 |
| 11               |                      |                       | 240.5                                           |
| 12               | 9.12 s               | 162.7                 | 294.6                                           |
| 13               |                      |                       | 294.6                                           |
| 14               | 8.95                 | 160.7                 |                                                 |
| 15               |                      | 134.17                |                                                 |
| 16               | 8.36 br              | 163.55                |                                                 |
| 17               |                      |                       | -3.4                                            |
| 18               | 0.25                 | -3.2                  |                                                 |
| 19               |                      |                       | 228.5                                           |
| 20               | 8.81                 | 160.9                 |                                                 |
| 21               |                      | 134.2                 |                                                 |
| 22               | 7.68 br              | 163.3                 |                                                 |
| 23               |                      |                       | 295.0                                           |
| 24               | 8.92                 | 164.3                 |                                                 |
| 25               |                      |                       | -3.67                                           |
| 26               | 0.04                 | -3.42                 |                                                 |



### 3. References

1. Torres, O., M. Martín, and E. Sola, *Labile N-Heterocyclic Carbene Complexes of Iridium*. *Organometallics*, 2009. **28**(3): p. 863-870.
2. Stott, K., et al., *Excitation Sculpting in High-Resolution Nuclear Magnetic Resonance Spectroscopy: Application to Selective NOE Experiments*. *Journal of the American Chemical Society*, 1995. **117**(14): p. 4199-4200.
3. Stonehouse, J., et al., *Ultraprecise NOE Spectra*. *Journal of the American Chemical Society*, 1994. **116**(13): p. 6037-6038.
4. Shaw, A.A., et al., *Artifact-Free PFG-Enhanced Double-Quantum-Filtered COSY Experiments*. *Journal of Magnetic Resonance, Series A*, 1996. **120**(1): p. 110-115.
5. Ancian, B., et al., *Artifact-Free Pure Absorption PFG-Enhanced DQF-COSY Spectra Including a Gradient Pulse in the Evolution Period*. *Journal of Magnetic Resonance*, 1997. **125**(2): p. 348-354.
6. Kessler, H., et al., *Transformation of homonuclear two-dimensional NMR techniques into one-dimensional techniques using Gaussian pulses*. *Journal of Magnetic Resonance* (1969), 1986. **70**(1): p. 106-133.
7. Vassilev, N.G. and V.S. Dimitrov, *Dynamic NMR: combined use of 1D selective EXSY and complete lineshape analysis of spectra subjected to reference deconvolution and linear prediction or the maximum entropy method*. *Magnetic Resonance in Chemistry*, 2001. **39**(10): p. 607-614.
8. Butcher, J.C., *Numerical Methods for Ordinary Differential Equations*. 2 ed. 2008, New York: John Wiley & Sons.
9. Runge, C., *Ueber die numerische Auflösung von Differentialgleichungen*. *Mathematische Annalen*, 1895. **46**(2): p. 167-178.
10. Kutta, W., *Beitrag zur näherungsweise Integration totaler Differentialgleichungen*. *Z.Math.Phys.*, 1901. **46**: p. 435-453.
11. Levenberg, K., *A Method for the Solution of Certain Non-Linear Problems in Least Squares*. *The Quarterly of Applied Mathematics*, 1944(2): p. 164-168.
12. Marquardt, D., *An Algorithm for Least-Squares Estimation of Nonlinear Parameters*. *Journal of the Society for Industrial and Applied Mathematics*, 1963. **11**(2): p. 431-441.
13. Polanyi, J.C., *Concepts in reaction dynamics*. *Accounts of Chemical Research*, 1972. **5**(5): p. 161-168.
14. Eyring, H., *The Activated Complex and the Absolute Rate of Chemical Reactions*. *Chemical Reviews*, 1935. **17**(1): p. 65-77.
15. Lloyd, L.S., et al., *Hyperpolarisation through reversible interactions with parahydrogen*. *Catalysis Science & Technology*, 2014. **4**(10): p. 3544-3554.
16. Dolomanov, O.V., et al., *OLEX2: a complete structure solution, refinement and analysis program*. *Journal of Applied Crystallography*, 2009. **42**(2): p. 339-341.
17. Sheldrick, G., *A short history of SHELX*. *Acta Crystallographica Section A*, 2008. **64**(1): p. 112-122.
18. Sheldrick, G., *Crystal structure refinement with SHELXL*. *Acta Crystallographica Section C*, 2015. **71**(1): p. 3-8.
